# Supplementary material for: Molecular iodine-catalyzed multicomponent synthesis of α-cyanopyrrolines with ambient air as the oxidant under neat conditions
Source: Royal Society of Chemistry journal article supplement (doi:10.1039/d0qo01113d), 2020-01-01

## **Molecular Iodine-Catalyzed Multicomponent Synthesis of $\alpha$ -Cyanopyrrolines with Ambient Air as the Oxidant under Neat Conditions**

Qing-Wen Gui<sup>a</sup>, Fan Teng<sup>a</sup>, Zhou-Chao Li<sup>a</sup>, Xue-Feng Jin<sup>a</sup>, Mei Zhang<sup>a</sup>, Jia-Ni Dai<sup>a</sup>, Ying-Wu Lin<sup>c</sup>, Zhong Cao<sup>b</sup> and Wei-Min He<sup>b\*</sup>

<sup>a</sup>College of Chemistry and Materials Science, Hunan Agricultural University, Changsha 410128, China

<sup>b</sup>Hunan Provincial Key Laboratory of Materials Protection for Electric Power and Transportation, Changsha University of Science and Technology, Changsha, 410114, China

<sup>c</sup>School of Chemistry and Chemical Engineering, University of South China, Hengyang, 421001, China

E-mail: weiminhe2016@yeah.net

### **Table of Content**

|                                                                    |            |
|--------------------------------------------------------------------|------------|
| <b>1. General Information</b>                                      | <b>S2</b>  |
| <b>2. Experimental Section</b>                                     | <b>S2</b>  |
| <b>3. Characterization data of products</b>                        | <b>S3</b>  |
| <b>4. References</b>                                               | <b>S10</b> |
| <b>5. <sup>1</sup>H and <sup>13</sup>C NMR spectra of products</b> | <b>S11</b> |

---

## 1. General Information

All reactions were carried out in anhydrous solvent and commercially available reagents were used as received unless otherwise stated. Analytical thin layer chromatography (TLC) was performed on precoated aluminium-backed silica gel 60 F<sub>254</sub> plates (EMD Millipore, 200  $\mu$ m thickness). TLC plates were visualized with ultraviolet light and treatment with KMnO<sub>4</sub> or vanillin stains followed by heating. Flash column chromatography was performed using Tsingtao silica gel (200-300). <sup>1</sup>H and <sup>13</sup>C NMR spectra were recorded on a Bruker Avance DRX - 400 spectrometers; chemical shifts ( $\delta$ ) are given in ppm and calibrated using the signal of residual undeuterated solvent as internal reference (CDCl<sub>3</sub>:  $\delta_{\text{H}}$  = 7.26 ppm and  $\delta_{\text{C}}$  = 77.16 ppm; DMSO-*d*<sub>6</sub>:  $\delta_{\text{H}}$  = 2.54 ppm and  $\delta_{\text{C}}$  = 39.60 ppm). Data for <sup>1</sup>H NMR and <sup>13</sup>C NMR are reported as follows: chemical shift ( $\delta$ , ppm), multiplicity, integration, and coupling constant (Hz).

## 2. Experimental Section

### General experimental procedures for compounds 4

In a vial was placed alkene (0.5 mmol), TMSCN (0.5 mmol), *N,N*-disubstituted formamide (0.5 mmol) and molecular iodine (0.05 mmol), then the contents were reacted under 80 °C for 4 h. Upon completion, the reaction mixture was quenched by addition of 10 mL of water. The aqueous layer was extracted three times with EtOAc (10 mL  $\times$  3), and the combine organic layers were washed with saturated sodium sulfite solution and dried over anhydrous sodium sulfate, evaporated to dryness, and purified by column chromatography to afford the desired products.

### Large-scale synthesis of 4o

In a flask (50 mL) equipped with a stir bar, 4-nitrostyrene (20 mmol, 2.98 g), TMSCN (20 mmol, 1.98 g), *N,N*-disubstituted formamide (20 mmol, 1.54 g) and molecular iodine (2 mmol, 0.51 g) were added, then the contents were reacted under 80 °C for 4 h. After completion, saturated sodium sulfite solution (25 mL) was added dropwise into the mixture. The precipitates were formed and collected by filtration and wash with ethyl acetate to give the product **4o** (3.8 g, 83% yield).

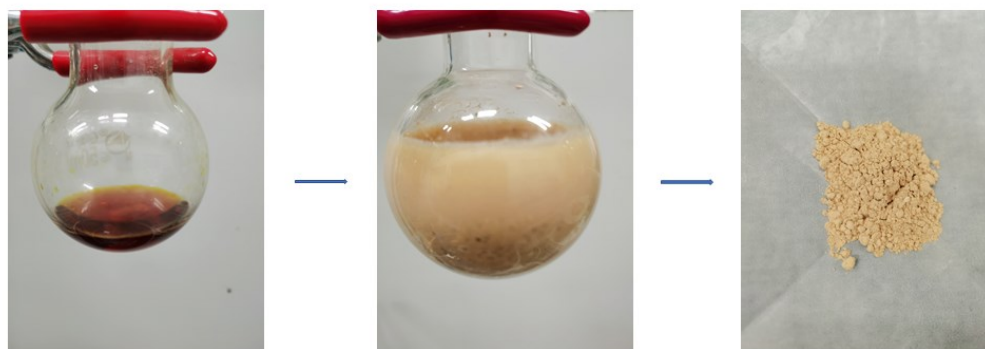

### 3. Characterization data of products

#### *1-methyl-3-phenyl-4,5-dihydro-1H-pyrrole-2-carbonitrile (4a)*<sup>1</sup>

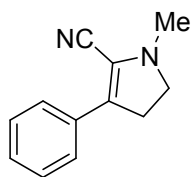

<sup>1</sup>H NMR (400 MHz, CDCl<sub>3</sub>): δ 7.50 (d, *J* = 8.4 Hz, 2 H), 7.27 (t, *J* = 7.6 Hz, 2 H), 7.17 (t, *J* = 7.6 Hz, 1 H), 3.14 (t, *J* = 9.6 Hz, 2 H), 2.86 (t, *J* = 9.6 Hz, 2 H), 2.68 (s, 3 H); <sup>13</sup>C NMR (101 MHz, CDCl<sub>3</sub>): δ 133.05, 130.76, 128.76, 127.86, 125.58, 120.14, 114.66, 54.86, 39.09, 32.46.

#### *3-([1,1'-biphenyl]-4-yl)-1-methyl-4,5-dihydro-1H-pyrrole-2-carbonitrile (4b)*

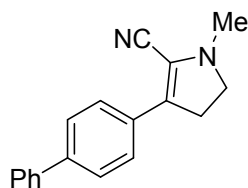

<sup>1</sup>H NMR (400 MHz, CDCl<sub>3</sub>): δ 7.69 – 7.67 (m, 2 H), 7.63 – 7.60 (m, 4 H), 7.46 (t, *J* = 7.2 Hz, 2 H), 7.36 (t, *J* = 7.2 Hz, 1 H), 3.26 (t, *J* = 10.0 Hz, 2 H), 2.99 (t, *J* = 9.6 Hz, 2 H), 2.79 (s, 3 H); <sup>13</sup>C NMR (101 MHz, CDCl<sub>3</sub>): δ 174.94, 141.02, 140.05, 139.10, 128.80, 128.39, 127.55, 127.26, 127.15, 125.96, 108.27, 47.80, 30.20, 27.97; HRMS (ESI) *m/z* calcd. for C<sub>18</sub>H<sub>17</sub>N<sub>2</sub> [M+H]<sup>+</sup>: 261.1386, found: 261.1390.

#### *1-methyl-3-(*p*-tolyl)-4,5-dihydro-1H-pyrrole-2-carbonitrile (4c)*

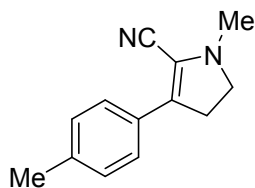

<sup>1</sup>H NMR (400 MHz, CDCl<sub>3</sub>): δ 7.49 (d, *J* = 8.4 Hz, 2 H), 7.17 (d, *J* = 8.0 Hz, 2 H), 3.21 (t, *J* = 10.0 Hz, 2 H), 2.93 (t, *J* = 9.2 Hz, 2 H), 2.75 (s, 3 H), 2.35 (s, 3 H); <sup>13</sup>C NMR (101 MHz, CDCl<sub>3</sub>): δ 138.01, 131.35, 129.50, 126.58, 125.59, 119.42, 114.89, 54.97, 39.31, 32.58, 21.39; HRMS (ESI) *m/z* calcd. for C<sub>13</sub>H<sub>15</sub>N<sub>2</sub> [M+H]<sup>+</sup>: 199.1230, found: 199.1235.

#### *3-(4-(*tert*-butyl)phenyl)-1-methyl-4,5-dihydro-1H-pyrrole-2-carbonitrile (4d)*

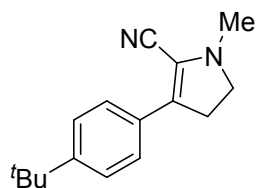

<sup>1</sup>H NMR (400 MHz, CDCl<sub>3</sub>): δ 7.55 (d, *J* = 8.4 Hz, 2 H), 7.22 (d, *J* = 8.4 Hz, 2 H), 3.21 (t, *J* = 9.2 Hz, 2 H), 2.94 (t, *J* = 9.6 Hz, 2 H), 2.76 (s, 3 H), 1.36 – 1.32 (m, 9 H); <sup>13</sup>C NMR (101 MHz, CDCl<sub>3</sub>): δ 151.17, 131.15, 127.59, 125.69, 125.39, 119.47, 114.86, 54.93, 39.24, 34.77, 32.48, 31.30; HRMS (ESI) *m/z* calcd. for C<sub>16</sub>H<sub>21</sub>N<sub>2</sub> [M+H]<sup>+</sup>: 241.1699, found: 241.1704.

#### *3-(4-methoxyphenyl)-1-methyl-4,5-dihydro-1H-pyrrole-2-carbonitrile (4e)*

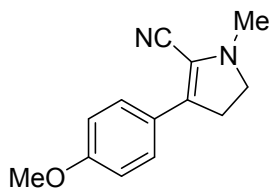

$^1\text{H}$  NMR (400 MHz,  $\text{CDCl}_3$ ):  $\delta$  7.54 (d,  $J = 8.8$  Hz, 2 H), 7.44 (d,  $J = 8.4$  Hz, 2 H), 3.82 (s, 3 H), 3.19 (t,  $J = 9.6$  Hz, 2 H), 2.91 (t,  $J = 9.2$  Hz, 2 H), 2.73 (s, 3 H);  $^{13}\text{C}$  NMR (101 MHz,  $\text{CDCl}_3$ ):  $\delta$  159.32, 131.33, 126.95, 125.57, 118.33, 114.99, 114.13, 55.31, 54.85, 39.35, 32.57; HRMS (ESI)  $m/z$  calcd. for  $\text{C}_{13}\text{H}_{15}\text{N}_2\text{O}$   $[\text{M}+\text{H}]^+$ : 215.1179, found: 215.1184.

**3-(4-fluorophenyl)-1-methyl-4,5-dihydro-1H-pyrrole-2-carbonitrile (4f)**

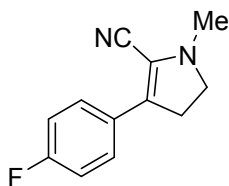

$^1\text{H}$  NMR (400 MHz,  $\text{CDCl}_3$ ):  $\delta$  7.57 – 7.54 (m, 2 H), 7.05 (t,  $J = 8.8$  Hz, 2 H), 3.22 (t,  $J = 8.8$  Hz, 2 H), 2.92 (q,  $J = 9.6$  Hz, 2 H), 2.75 (s, 3 H);  $^{13}\text{C}$  NMR (101 MHz,  $\text{CDCl}_3$ ):  $\delta$  163.45 (d,  $J = 249.3$  Hz), 129.80, 129.33 (d,  $J = 3.5$  Hz), 127.38 (d,  $J = 8.1$  Hz), 119.95, 115.92 (d,  $J = 21.8$  Hz), 114.62, 54.84, 39.15, 32.66; HRMS (ESI)  $m/z$  calcd. for  $\text{C}_{12}\text{H}_{12}\text{FN}_2$   $[\text{M}+\text{H}]^+$ : 203.0979, found: 203.0981.

**3-(4-chlorophenyl)-1-methyl-4,5-dihydro-1H-pyrrole-2-carbonitrile (4g)**

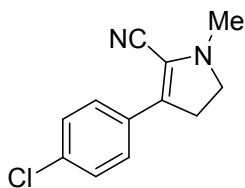

$^1\text{H}$  NMR (400 MHz,  $\text{CDCl}_3$ ):  $\delta$  7.52 – 7.48 (m, 2 H), 7.33 – 7.28 (m, 2 H), 3.24 (t,  $J = 10.0$  Hz, 2 H), 2.92 (t,  $J = 9.6$  Hz, 2 H), 2.76 (s, 3 H);  $^{13}\text{C}$  NMR (101 MHz,  $\text{CDCl}_3$ ):  $\delta$  133.32, 131.57, 129.08, 128.94, 126.70, 120.57, 114.43, 54.72, 38.92, 32.35; HRMS (ESI)  $m/z$  calcd. for  $\text{C}_{12}\text{H}_{12}\text{ClN}_2$   $[\text{M}+\text{H}]^+$ : 218.0684, found: 218.0690.

**3-(4-bromophenyl)-1-methyl-4,5-dihydro-1H-pyrrole-2-carbonitrile (4h)**

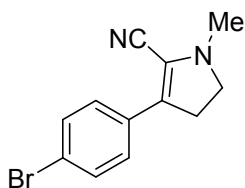

$^1\text{H}$  NMR (400 MHz,  $\text{CDCl}_3$ ):  $\delta$  7.48 – 7.42 (m, 4 H), 7.24 (t,  $J = 9.6$  Hz, 2 H), 2.92 (t,  $J = 9.6$  Hz, 2 H), 2.76 (s, 3 H);  $^{13}\text{C}$  NMR (101 MHz,  $\text{CDCl}_3$ ):  $\delta$  131.93, 131.33, 129.18, 126.98, 121.49, 120.71, 114.42, 54.74, 38.91, 32.31; HRMS (ESI)  $m/z$  calcd. for  $\text{C}_{12}\text{H}_{12}\text{BrN}_2$   $[\text{M}+\text{H}]^+$ : 263.0178, found: 263.0182.

**3-(4-iodophenyl)-1-methyl-4,5-dihydro-1H-pyrrole-2-carbonitrile (4i)**

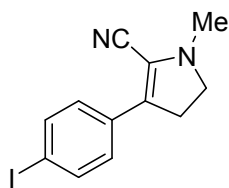

<sup>1</sup>H NMR (400 MHz, CDCl<sub>3</sub>): δ 7.66 (d, *J* = 8.4 Hz, 2 H), 7.30 (d, *J* = 8.4 Hz, 2 H), 3.24 (t, *J* = 10.0 Hz, 2 H), 2.90 (t, *J* = 9.6 Hz, 2 H), 2.76 (s, 3 H); <sup>13</sup>C NMR (101 MHz, CDCl<sub>3</sub>): δ 137.82, 132.54, 128.98, 127.07, 120.75, 114.36, 92.84, 54.67, 38.83, 32.14; HRMS (ESI) *m/z* calcd. for C<sub>12</sub>H<sub>12</sub>N<sub>2</sub> [M+H]<sup>+</sup>: 311.0040, found: 311.0046.

**1-methyl-3-(4-(trifluoromethyl)phenyl)-4,5-dihydro-1H-pyrrole-2-carbonitrile (4j)**

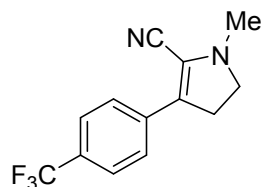

<sup>1</sup>H NMR (400 MHz, CDCl<sub>3</sub>): δ 7.65 (d, *J* = 8.4 Hz, 2 H), 7.58 (d, *J* = 8.4 Hz, 2 H), 3.29 (t, *J* = 9.6 Hz, 2 H), 4.07 (t, *J* = 9.6 Hz, 2 H), 2.80 (s, 3 H); <sup>13</sup>C NMR (101 MHz, CDCl<sub>3</sub>): δ 136.61, 129.27, 128.94, 127.72 (d, *J* = 3.8 Hz), 125.45, 122.86, 122.02, 114.11, 54.57, 38.57, 32.15; HRMS (ESI) *m/z* calcd. for C<sub>13</sub>H<sub>12</sub>F<sub>3</sub>N<sub>2</sub> [M+H]<sup>+</sup>: 253.0947, found: 253.0950.

**3-(4-formylphenyl)-1-methyl-4,5-dihydro-1H-pyrrole-2-carbonitrile (4k)**

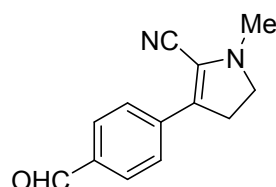

<sup>1</sup>H NMR (400 MHz, CDCl<sub>3</sub>): δ 9.96 (s, 1 H), 7.84 (d, *J* = 8.4 Hz, 2 H), 7.70 (d, *J* = 8.4 Hz, 2 H), 3.33 (t, *J* = 10.0 Hz, 2 H), 3.00 (t, *J* = 9.6 Hz, 2 H), 2.83 (s, 3 H); <sup>13</sup>C NMR (101 MHz, CDCl<sub>3</sub>): δ 191.40, 139.10, 134.86, 130.21, 127.39, 125.50, 122.68, 114.04, 54.41, 38.31, 31.97; HRMS (ESI) *m/z* calcd. for C<sub>13</sub>H<sub>13</sub>N<sub>2</sub>O [M+H]<sup>+</sup>: 213.1022, found: 213.1026.

**4-(2-cyano-1-methyl-4,5-dihydro-1H-pyrrol-3-yl)benzoic acid (4l)**

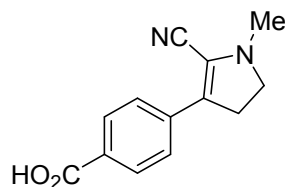

<sup>1</sup>H NMR (400 MHz, DMSO-*d*<sub>6</sub>): δ 12.96 (s, 1 H), 7.97 (d, *J* = 8.4 Hz, 2 H), 7.66 (d, *J* = 8.4 Hz, 2 H), 3.31 (t, *J* = 10.0 Hz, 2 H), 3.01 (t, *J* = 9.6 Hz, 2 H), 2.76 (s, 3 H); <sup>13</sup>C NMR (101 MHz, DMSO-*d*<sub>6</sub>): δ 166.87, 136.93, 129.77, 129.18, 128.35, 124.92, 121.08, 114.16, 53.96, 37.98, 31.52; HRMS (ESI) *m/z* calcd. for C<sub>16</sub>H<sub>19</sub>N<sub>2</sub>O<sub>2</sub> [M+H]<sup>+</sup>: 229.0972, found: 229.0976.

**4-(2-cyano-1-methyl-4,5-dihydro-1H-pyrrol-3-yl)phenyl acetate (4m)**

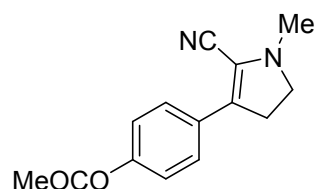

<sup>1</sup>H NMR (400 MHz, CDCl<sub>3</sub>): δ 7.58 (d, *J* = 8.8 Hz, 2 H), 7.08 (d, *J* = 8.8 Hz, 2 H), 3.22 (t, *J* = 7.3 Hz, 2 H), 2.92 (t, *J* = 9.2 Hz, 2 H), 2.75 (s, 3 H), 2.29 (s, 3 H); <sup>13</sup>C NMR (101 MHz, CDCl<sub>3</sub>): δ 169.37, 150.05, 130.77, 129.72, 126.59, 121.93, 120.17, 114.55, 54.78, 39.02, 32.50, 21.18; HRMS (ESI) *m/z* calcd. for C<sub>14</sub>H<sub>15</sub>N<sub>2</sub>O<sub>2</sub> [M+H]<sup>+</sup>: 243.1128, found: 243.1134.

**3-(4-cyanophenyl)-1-methyl-4,5-dihydro-1H-pyrrole-2-carbonitrile (4n)**

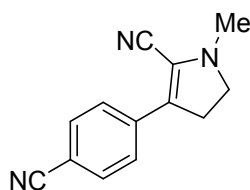

$^1\text{H NMR}$  (400 MHz,  $\text{CDCl}_3$ ):  $\delta$  7.64 – 7.59 (m, 4 H), 3.33 (t,  $J = 9.6$  Hz, 2 H), 2.96 (t,  $J = 9.6$  Hz, 2 H), 2.83 (s, 3 H);  $^{13}\text{C NMR}$  (101 MHz,  $\text{CDCl}_3$ ):  $\delta$  168.87, 137.61, 132.53, 128.97, 125.49, 122.89, 113.84, 110.22, 54.37, 38.27, 31.84; HRMS (ESI)  $m/z$  calcd. for  $\text{C}_{13}\text{H}_{12}\text{N}_3$   $[\text{M}+\text{H}]^+$ : 210.1026, found: 210.1030.

**1-methyl-3-(4-nitrophenyl)-4,5-dihydro-1H-pyrrole-2-carbonitrile (4o)**

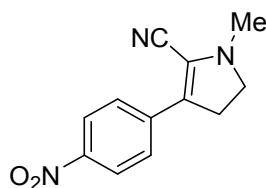

$^1\text{H NMR}$  (400 MHz,  $\text{CDCl}_3$ ):  $\delta$  8.14 (d,  $J = 9.2$  Hz, 2 H), 7.63 (d,  $J = 9.2$  Hz, 2 H), 3.36 (t,  $J = 10.0$  Hz, 2 H), 2.98 (t,  $J = 10.0$  Hz, 2 H), 2.84 (s, 3 H);  $^{13}\text{C NMR}$  (101 MHz,  $\text{CDCl}_3$ ):  $\delta$  145.78, 139.61, 125.49, 125.19, 124.09, 123.39, 113.68, 54.11, 37.92, 31.72; HRMS (ESI)  $m/z$  calcd. for  $\text{C}_{12}\text{H}_{12}\text{N}_3\text{O}_2$   $[\text{M}+\text{H}]^+$ : 230.0924, found: 230.0928.

**1-methyl-3-(*m*-tolyl)-4,5-dihydro-1H-pyrrole-2-carbonitrile (4p)**

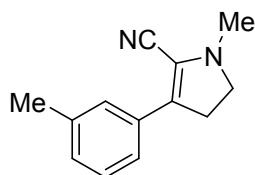

$^1\text{H NMR}$  (400 MHz,  $\text{CDCl}_3$ ):  $\delta$  7.41 (t,  $J = 8.0$  Hz, 1 H), 7.38 (s, 1 H), 7.25 (t,  $J = 7.6$  Hz, 1 H), 7.09 (d,  $J = 7.6$  Hz, 1 H), 3.22 (t,  $J = 9.2$  Hz, 2 H), 2.94 (t,  $J = 9.2$  Hz, 2 H), 2.76 (s, 3 H) 2.36 (s, 3 H);  $^{13}\text{C NMR}$  (101 MHz,  $\text{CDCl}_3$ ):  $\delta$  138.36, 133.00, 131.11, 128.76, 126.26, 122.81, 120.01, 114.73, 108.40, 54.92, 39.19, 32.56, 21.57; HRMS (ESI)  $m/z$  calcd. for  $\text{C}_{13}\text{H}_{15}\text{N}_2$   $[\text{M}+\text{H}]^+$ : 199.1230, found: 199.1235.

**1-methyl-3-(*o*-tolyl)-4,5-dihydro-1H-pyrrole-2-carbonitrile (4q)**

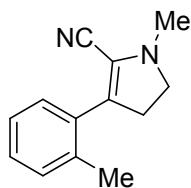

$^1\text{H NMR}$  (400 MHz,  $\text{CDCl}_3$ ):  $\delta$  7.28 – 7.19 (m, 4 H), 3.26 (t,  $J = 9.6$  Hz, 2 H), 2.90 (t,  $J = 9.6$  Hz, 2 H), 2.76 (s, 3 H) 2.38 (s, 3 H);  $^{13}\text{C NMR}$  (101 MHz,  $\text{CDCl}_3$ ):  $\delta$  136.18, 134.11, 133.24, 130.80, 128.92, 128.39, 126.08, 123.68, 113.61, 55.94, 39.57, 35.38, 20.44; HRMS (ESI)  $m/z$  calcd. for  $\text{C}_{13}\text{H}_{15}\text{N}_2$   $[\text{M}+\text{H}]^+$ : 199.1230, found: 199.1236.

**3-(2-chlorophenyl)-1-methyl-4,5-dihydro-1H-pyrrole-2-carbonitrile (4r)**

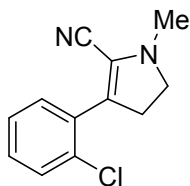

$^1\text{H}$  NMR (400 MHz,  $\text{CDCl}_3$ ):  $\delta$  7.43 – 7.41 (m, 1 H), 7.40 – 7.38 (m, 1 H), 7.31 – 7.28 (m, 1 H), 7.27 – 7.25 (m, 1 H), 3.29 (t,  $J$  = 10.0 Hz, 2 H), 3.04 (t,  $J$  = 8.8 Hz, 2 H), 2.78 (s, 3 H);  $^{13}\text{C}$  NMR (101 MHz,  $\text{CDCl}_3$ ):  $\delta$  133.10, 132.69, 131.21, 130.59, 130.28, 129.51, 127.09, 124.56, 113.24, 55.91, 39.14, 34.31; HRMS (ESI)  $m/z$  calcd. for  $\text{C}_{12}\text{H}_{12}\text{ClN}_2$   $[\text{M}+\text{H}]^+$ : 219.0684, found: 219.0688.

**1-methyl-3-(4-vinylphenyl)-4,5-dihydro-1H-pyrrole-2-carbonitrile (4s)**

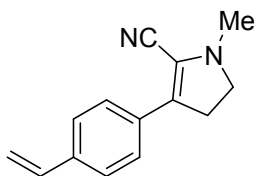

$^1\text{H}$  NMR (400 MHz,  $\text{CDCl}_3$ ):  $\delta$  7.55 (d,  $J$  = 8.4 Hz, 2 H), 7.39 (d,  $J$  = 8.4 Hz, 2 H), 6.73 – 6.66 (m, 1 H), 5.76 (d,  $J$  = 17.6 Hz, 1 H), 5.26 (d,  $J$  = 10.8 Hz, 1 H), 3.23 (t,  $J$  = 9.6 Hz, 2 H), 2.92 (t,  $J$  = 9.6 Hz, 2 H), 2.77 (s, 3 H);  $^{13}\text{C}$  NMR (101 MHz,  $\text{CDCl}_3$ ):  $\delta$  137.05, 136.36, 132.43, 130.40, 126.58, 125.68, 120.00, 114.76, 114.30, 54.82, 39.08, 32.36; HRMS (ESI)  $m/z$  calcd. for  $\text{C}_{14}\text{H}_{15}\text{N}_2$   $[\text{M}+\text{H}]^+$ : 211.1230, found: 211.1234.

**3-(4-hydroxy-3-methoxyphenyl)-1-methyl-4,5-dihydro-1H-pyrrole-2-carbonitrile (4t)**

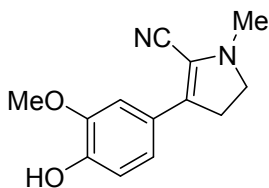

$^1\text{H}$  NMR (400 MHz,  $\text{CDCl}_3$ ):  $\delta$  7.35 (d,  $J$  = 2.0 Hz, 1 H), 6.96 – 6.93 (m, 1 H), 6.89 (d,  $J$  = 8.4 Hz, 1 H), 5.76 (s, 1 H), 3.92 (s, 3 H), 3.19 (t,  $J$  = 9.6 Hz, 2 H), 2.92 (t,  $J$  = 9.2 Hz, 2 H), 2.74 (s, 3 H);  $^{13}\text{C}$  NMR (101 MHz,  $\text{CDCl}_3$ ):  $\delta$  146.69, 145.92, 131.92, 125.47, 119.61, 118.43, 115.30, 114.58, 107.93, 56.13, 55.01, 39.51, 32.72; HRMS (ESI)  $m/z$  calcd. for  $\text{C}_{13}\text{H}_{15}\text{N}_2\text{O}_2$   $[\text{M}+\text{H}]^+$ : 231.1128, found: 231.1132.

**1-methyl-3-(naphthalen-2-yl)-4,5-dihydro-1H-pyrrole-2-carbonitrile (4u)**

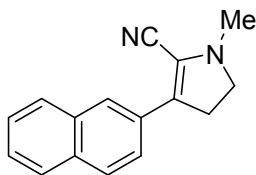

$^1\text{H}$  NMR (400 MHz,  $\text{CDCl}_3$ ):  $\delta$  7.94 – 7.92 (m, 1 H), 7.82 – 7.80 (m, 4 H), 7.50 – 7.44 (m, 2 H), 3.27 (t,  $J$  = 10.4 Hz, 2 H), 3.06 (q,  $J$  = 9.2 Hz, 2 H), 2.80 (s, 3 H);  $^{13}\text{C}$  NMR (101 MHz,  $\text{CDCl}_3$ ):  $\delta$  174.99, 137.44, 133.56, 132.58, 128.60, 127.83, 127.67, 126.74, 126.15, 126.06, 125.77, 108.54, 48.24, 47.86, 30.24, 28.04; HRMS (ESI)  $m/z$  calcd. for  $\text{C}_{16}\text{H}_{15}\text{N}_2$   $[\text{M}+\text{H}]^+$ : 235.1230, found: 235.1235.

**1-methyl-3-(pyridin-2-yl)-4,5-dihydro-1H-pyrrole-2-carbonitrile (4v)**

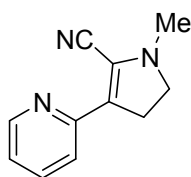

$^1\text{H}$  NMR (400 MHz,  $\text{CDCl}_3$ ):  $\delta$  8.57 (d,  $J = 4.4$  Hz, 1 H), 7.65 – 7.61 (m, 1 H), 7.54 (t,  $J = 8.0$  Hz, 1 H), 7.11 – 7.08 (m, 1 H), 3.30 (t,  $J = 10.0$  Hz, 2 H), 3.04 (t,  $J = 9.6$  Hz, 2 H), 2.81 (s, 3 H);  $^{13}\text{C}$  NMR (101 MHz,  $\text{CDCl}_3$ ):  $\delta$  151.89, 149.53, 136.30, 129.53, 123.04, 121.66, 119.89, 114.04, 54.86, 38.37, 31.16; HRMS (ESI)  $m/z$  calcd. for  $\text{C}_{11}\text{H}_{12}\text{N}_3$   $[\text{M}+\text{H}]^+$ : 186.1026, found: 186.1030.

**1,4-dimethyl-3-phenyl-1H-pyrrole-2-carbonitrile (4w)**

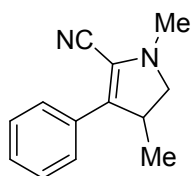

$^1\text{H}$  NMR (400 MHz,  $\text{CDCl}_3$ ):  $\delta$  7.48 – 7.46 (m, 2 H), 7.29 (t,  $J = 8.0$  Hz, 2 H), 7.19 (t,  $J = 7.6$  Hz, 1 H), 3.40 – 3.31 (m, 1 H), 3.20 (t,  $J = 9.6$  Hz, 1 H), 2.92 – 2.86 (m, 1 H), 2.67 (s, 3 H), 1.09 (d,  $J = 6.8$  Hz, 3 H);  $^{13}\text{C}$  NMR (101 MHz,  $\text{CDCl}_3$ ):  $\delta$  136.16, 132.35, 128.88, 127.83, 126.31, 119.88, 114.66, 62.73, 38.92, 29.84, 18.14; HRMS (ESI)  $m/z$  calcd. for  $\text{C}_{13}\text{H}_{15}\text{N}_2$   $[\text{M}+\text{H}]^+$ : 199.1230, found: 199.1234.

**2-methyl-1,2,8,8a-tetrahydroindeno[1,2-c]pyrrole-3-carbonitrile (4x)**

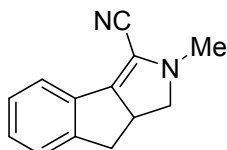

$^1\text{H}$  NMR (400 MHz,  $\text{CDCl}_3$ ):  $\delta$  7.57 (t,  $J = 3.2$  Hz, 1 H), 7.22 (d,  $J = 7.2$  Hz, 3 H), 3.97 (t,  $J = 8.4$  Hz, 1 H), 3.67 (t,  $J = 9.2$  Hz, 1 H), 7.34 – 7.21 (m, 2 H), 3.09 – 3.06 (m, 1 H), 2.77 (s, 3 H);  $^{13}\text{C}$  NMR (101 MHz,  $\text{CDCl}_3$ ):  $\delta$  173.88, 141.94, 139.50, 127.86, 127.27, 125.14, 124.80, 113.20, 55.76, 53.61, 38.90, 34.62, 29.76; HRMS (ESI)  $m/z$  calcd. for  $\text{C}_{13}\text{H}_{13}\text{N}_2$   $[\text{M}+\text{H}]^+$ : 197.1073, found: 197.1076.

**2-methyl-3,3a,4,5-tetrahydro-2H-benzo[e]isoindole-1-carbonitrile (4y)**

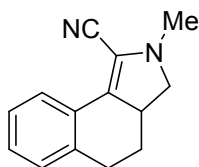

$^1\text{H}$  NMR (400 MHz,  $\text{CDCl}_3$ ):  $\delta$  8.08 (d,  $J = 7.2$  Hz, 1 H), 7.21 – 7.14 (m, 3 H), 3.65 (t,  $J = 8.8$  Hz, 1 H), 3.23 – 3.13 (m, 1 H), 2.90 – 2.88 (m, 1 H), 2.73 (s, 3 H), 2.51 (q,  $J = 8.8$  Hz, 1 H), 2.16 – 2.10 (m, 1 H), 1.71 – 1.60 (m, 2 H);  $^{13}\text{C}$  NMR (101 MHz,  $\text{CDCl}_3$ ):  $\delta$  136.62, 132.14, 129.44, 128.64, 128.03, 126.75, 124.24, 116.81, 114.97, 61.78, 43.42, 39.15, 29.99, 27.86; HRMS (ESI)  $m/z$  calcd. for  $\text{C}_{14}\text{H}_{15}\text{N}_2$   $[\text{M}+\text{H}]^+$ : 211.1230, found: 211.1234.

**(E)-1-methyl-3-styryl-4,5-dihydro-1H-pyrrole-2-carbonitrile (4z)**

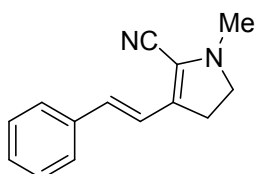



<sup>1</sup>H NMR (400 MHz, CDCl<sub>3</sub>): δ 7.43 (d, *J* = 7.6 Hz, 2 H), 7.33 (t, *J* = 7.2 Hz, 2 H), 7.23 (t, *J* = 7.2 Hz, 1 H), 7.06 (d, *J* = 16.0 Hz, 1 H), 6.39 (d, *J* = 15.6 Hz, 1 H), 3.26 (t, *J* = 9.6 Hz, 2 H), 2.82 (t, *J* = 9.2 Hz, 2 H), 2.75 (s, 3 H); <sup>13</sup>C NMR (101 MHz, CDCl<sub>3</sub>): δ 137.17, 132.13, 129.29, 128.87, 127.82, 126.53, 123.37, 120.72, 113.21, 55.00, 38.60, 29.85; HRMS (ESI) *m/z* calcd. for C<sub>14</sub>H<sub>15</sub>N<sub>2</sub> [M+H]<sup>+</sup>: 211.1230, found: 211.1236.

**1-ethyl-5-methyl-3-phenyl-4,5-dihydro-1H-pyrrole-2-carbonitrile (4aa)**

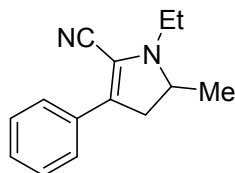

<sup>1</sup>H NMR (400 MHz, CDCl<sub>3</sub>): δ 7.57 (d, *J* = 7.6 Hz, 2 H), 7.35 (t, *J* = 7.6 Hz, 2 H), 7.23 (t, *J* = 7.6 Hz, 1 H), 3.65 – 3.55 (m, 1 H), 3.31 – 3.22 (m, 1 H), 3.19 – 3.09 (m, 2 H), 2.62 – 2.55 (m, 1 H), 1.31 (d, *J* = 6.0 Hz, 3 H), 1.16 (t, *J* = 7.2 Hz, 3 H); <sup>13</sup>C NMR (101 MHz, CDCl<sub>3</sub>): δ 133.34, 128.74, 128.27, 127.49, 125.39, 118.32, 114.99, 57.17, 42.53, 40.53, 19.68, 12.15; HRMS (ESI) *m/z* calcd. for C<sub>14</sub>H<sub>17</sub>N<sub>2</sub> [M+H]<sup>+</sup>: 213.1386, found: 213.1390.

**5-ethyl-3-phenyl-1-propyl-4,5-dihydro-1H-pyrrole-2-carbonitrile (4ab)**

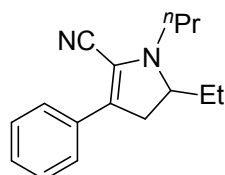

<sup>1</sup>H NMR (400 MHz, CDCl<sub>3</sub>): δ 7.58 (d, *J* = 7.6 Hz, 2 H), 7.34 (t, *J* = 7.6 Hz, 2 H), 7.23 (t, *J* = 7.6 Hz, 1 H), 3.48 – 3.40 (m, 1 H), 3.11 – 3.05 (m, 2 H), 2.66 – 2.59 (m, 1 H), 1.85 – 1.75 (m, 1 H), 1.70 – 1.49 (m, 4 H), 0.96 (t, *J* = 7.2 Hz, 6 H); <sup>13</sup>C NMR (101 MHz, CDCl<sub>3</sub>): δ 133.45, 128.72, 127.33, 127.22, 125.32, 118.98, 115.08, 63.80, 50.89, 37.70, 26.83, 21.03, 11.59, 9.65; HRMS (ESI) *m/z* calcd. for C<sub>16</sub>H<sub>21</sub>N<sub>2</sub> [M+H]<sup>+</sup>: 241.1699, found: 241.1704.

**2-phenyl-1,5,6,7,8,8a-hexahydroindolizine-3-carbonitrile (4ac)**

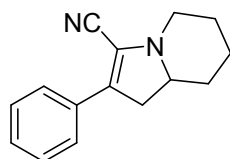

<sup>1</sup>H NMR (400 MHz, CDCl<sub>3</sub>): δ 7.57 (d, *J* = 7.2 Hz, 2 H), 7.35 (t, *J* = 7.6 Hz, 2 H), 7.23 (t, *J* = 7.6 Hz, 1 H), 3.69 – 3.65 (m, 1 H), 3.25 – 3.17 (m, 1 H), 2.98 – 2.92 (m, 1 H), 2.76 – 2.70 (m, 1 H), 2.60 – 2.53 (m, 1 H), 1.87 (d, *J* = 12.8 Hz, 1 H), 1.76 – 1.68 (m, 2 H), 1.62 – 1.51 (m, 2 H), 1.46 – 1.35 (m, 1 H); <sup>13</sup>C NMR (101 MHz, CDCl<sub>3</sub>): δ 133.63, 128.74, 128.36, 127.39, 125.27, 118.20, 114.39, 63.81, 47.57, 38.44, 29.68, 25.25, 24.13; HRMS (ESI) *m/z* calcd. for C<sub>15</sub>H<sub>17</sub>N<sub>2</sub> [M+H]<sup>+</sup>: 225.1386, found: 225.1388.

---

#### 4. References

1. X.-Q. Mou.; Z.-L. Xu.; L. Xu.; S.-H. Wang.; B.-H. Zhang.; D. Zhang.; J. Wang.; W.-T. Liu.; W. Bao., *Org. Lett.* **2016**, *18* (16), 4032-4035.

## 5. $^1\text{H}$ and $^{13}\text{C}$ NMR spectra of products

### *1-methyl-3-phenyl-4,5-dihydro-1H-pyrrole-2-carbonitrile (4a)*

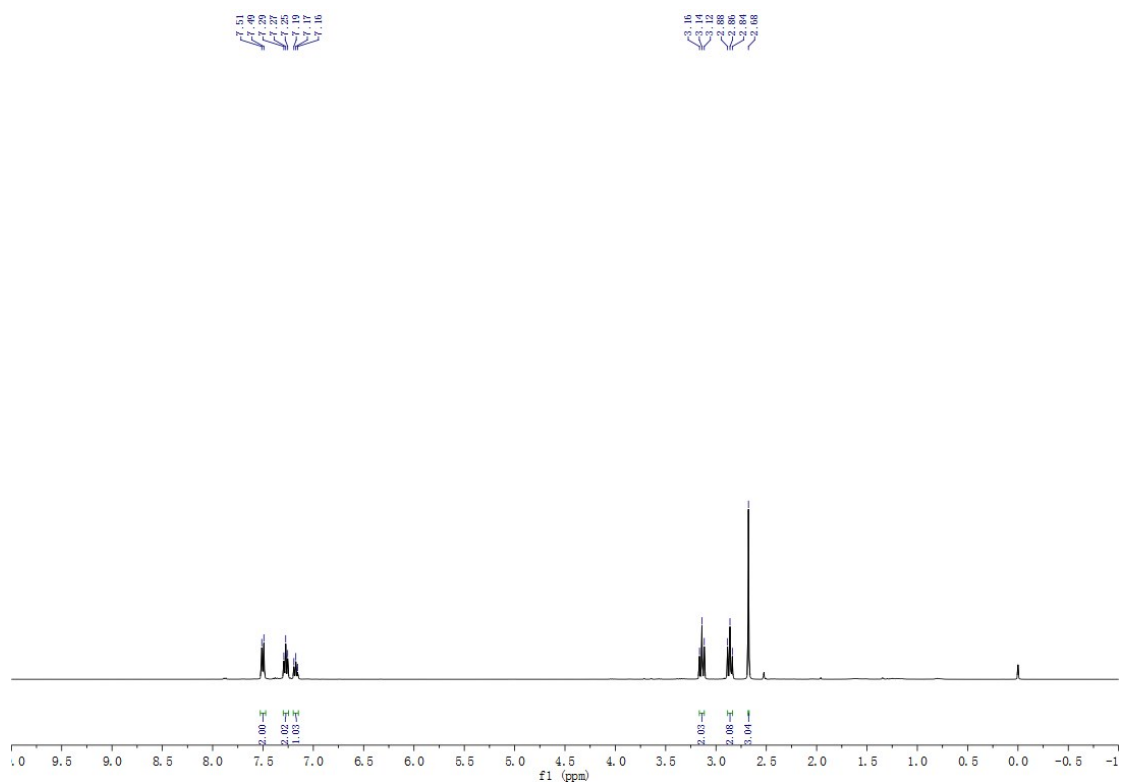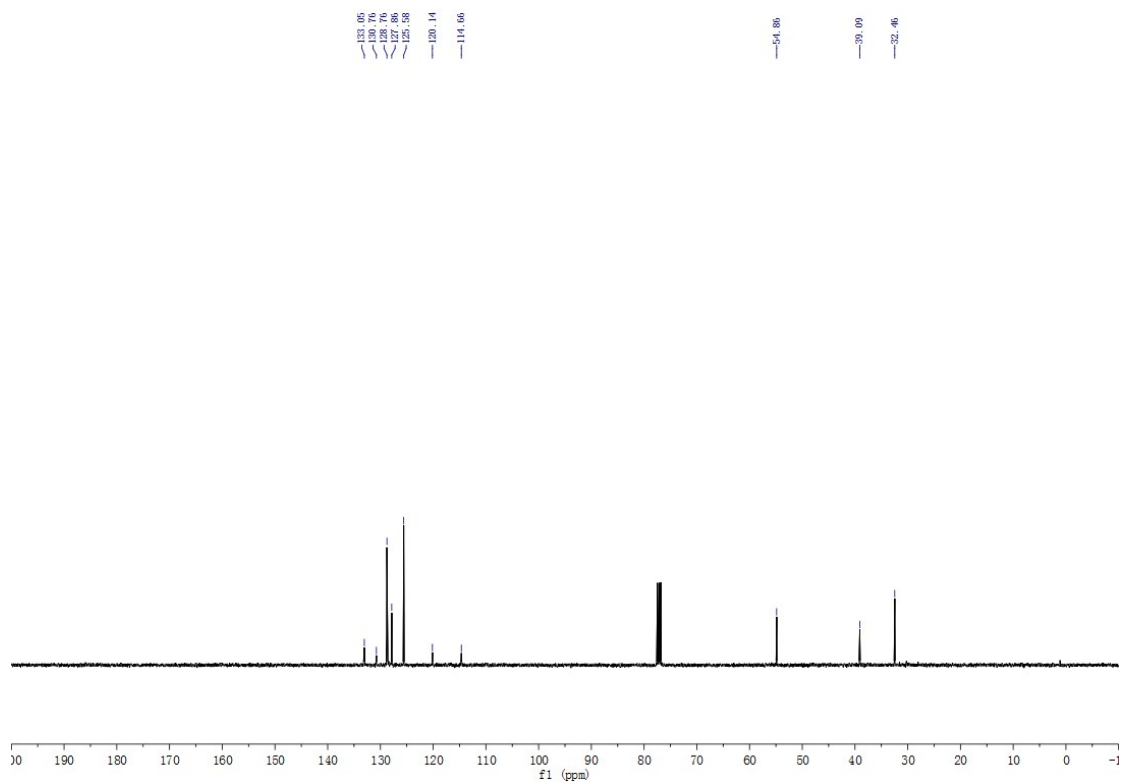

3-([1,1'-biphenyl]-4-yl)-1-methyl-4,5-dihydro-1H-pyrrole-2-carbonitrile (4b)

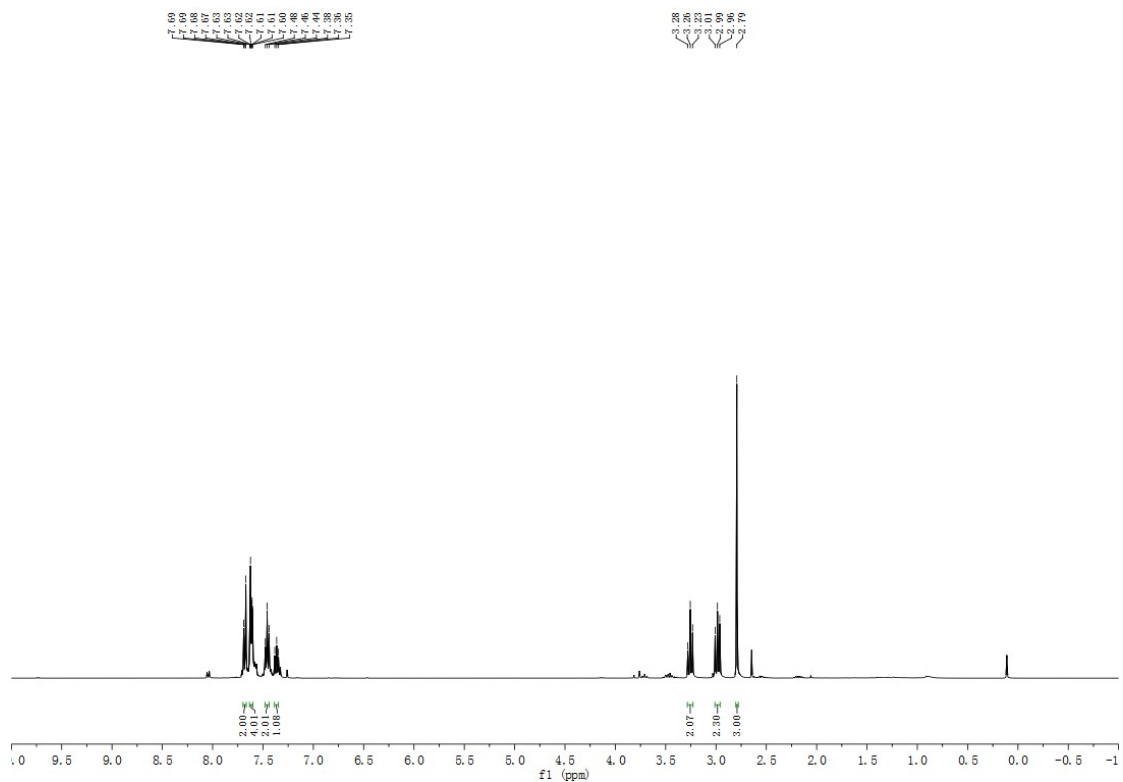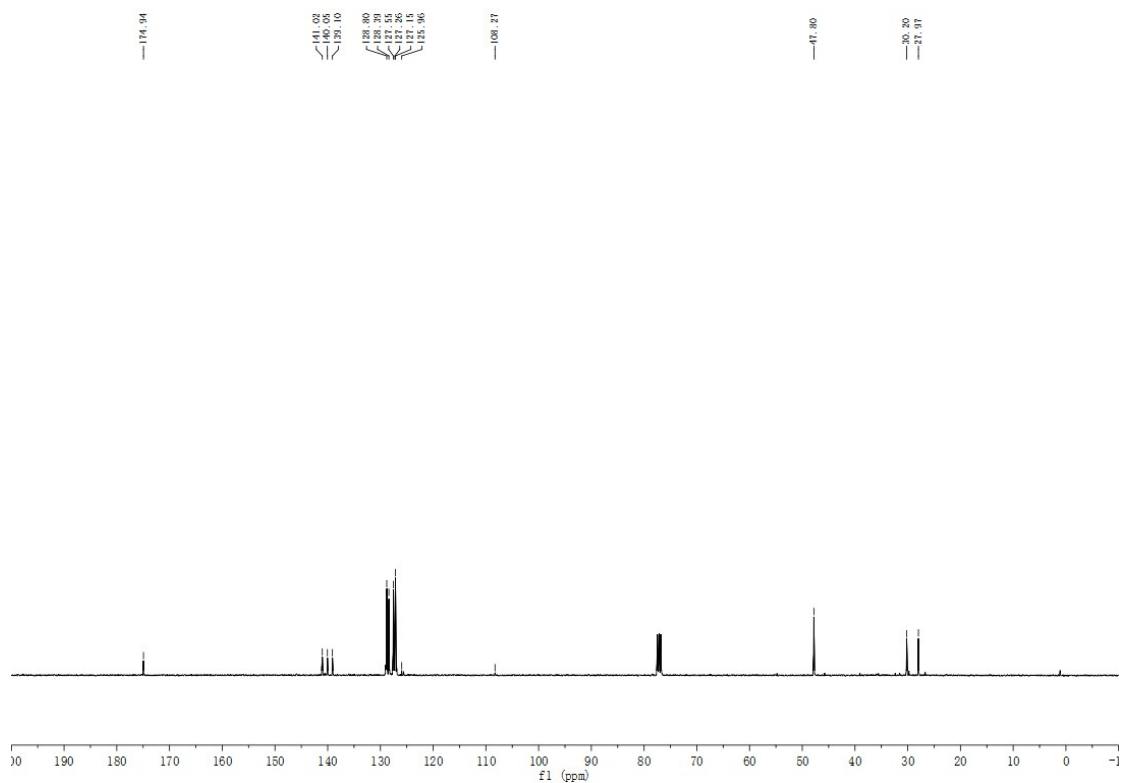

*1-methyl-3-(p-tolyl)-4,5-dihydro-1H-pyrrole-2-carbonitrile (4c)*

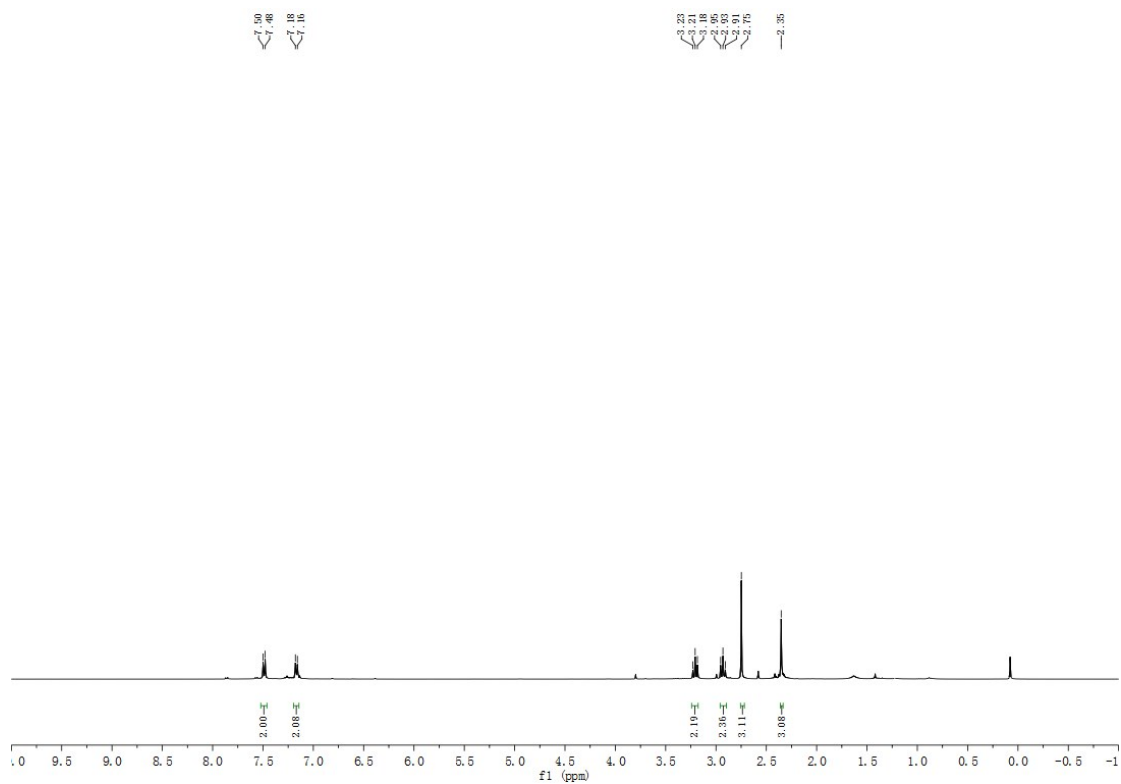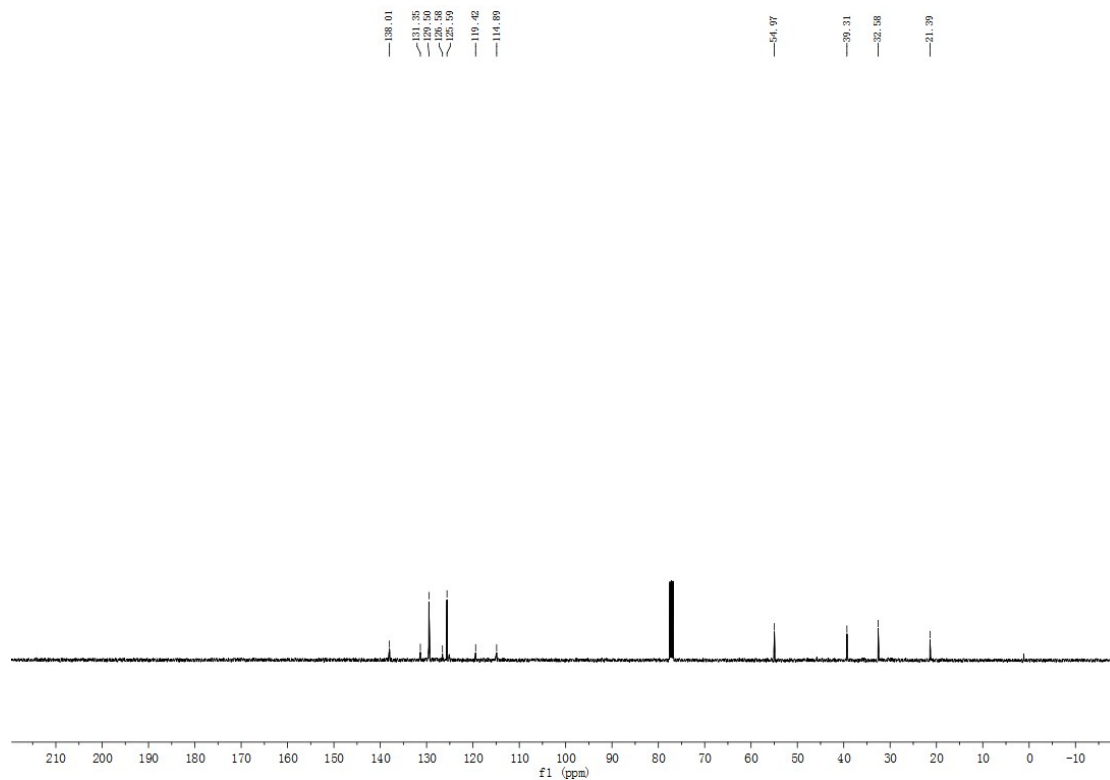

3-(4-(tert-butyl)phenyl)-1-methyl-4,5-dihydro-1H-pyrrole-2-carbonitrile (4d)

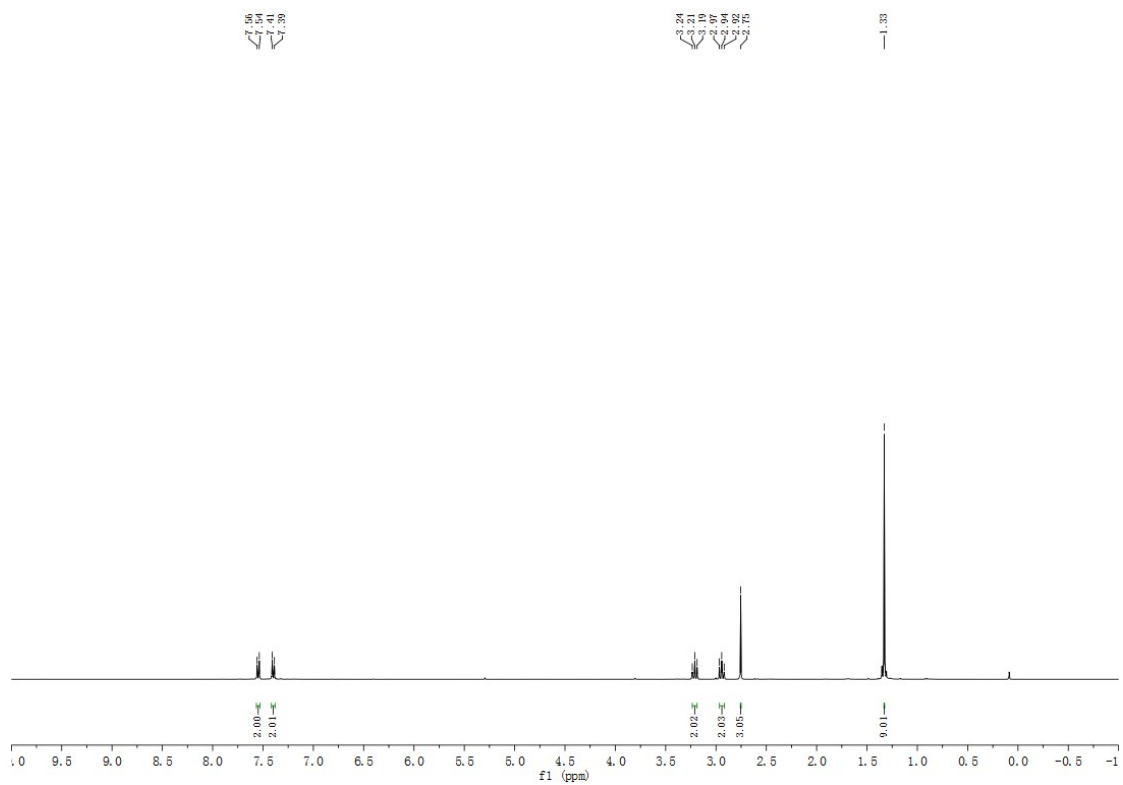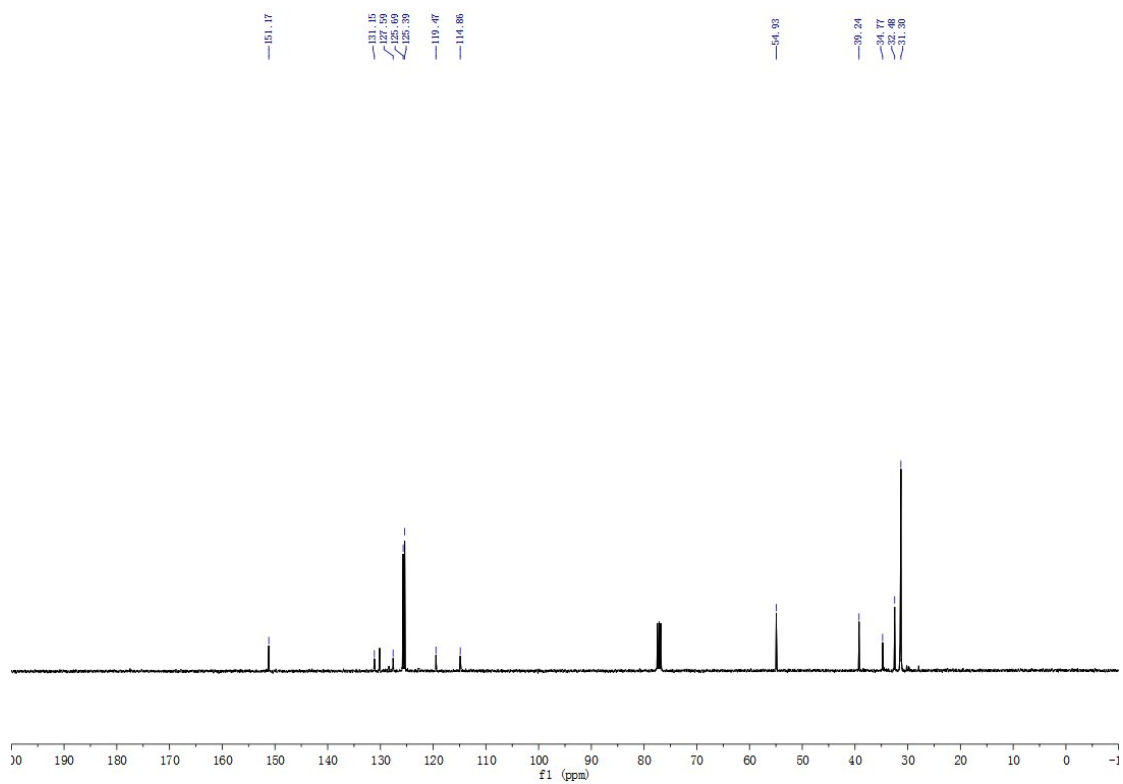

**3-(4-methoxyphenyl)-1-methyl-4,5-dihydro-1H-pyrrole-2-carbonitrile (4e)**

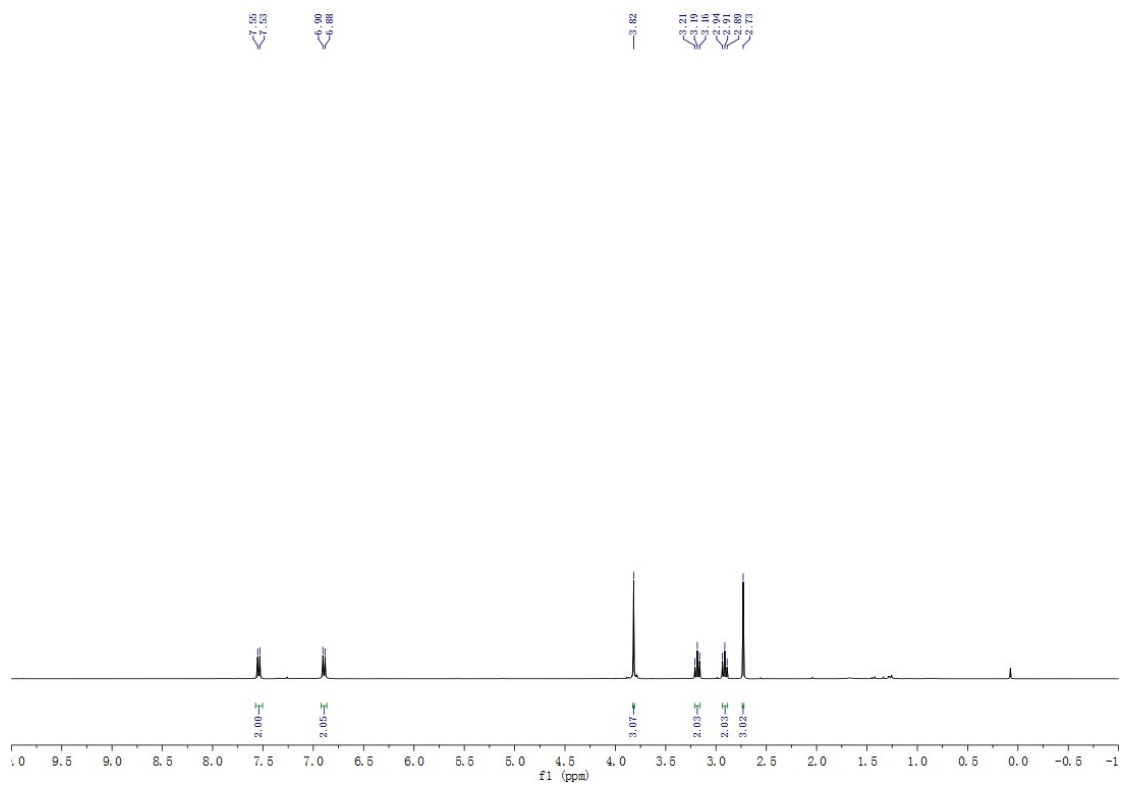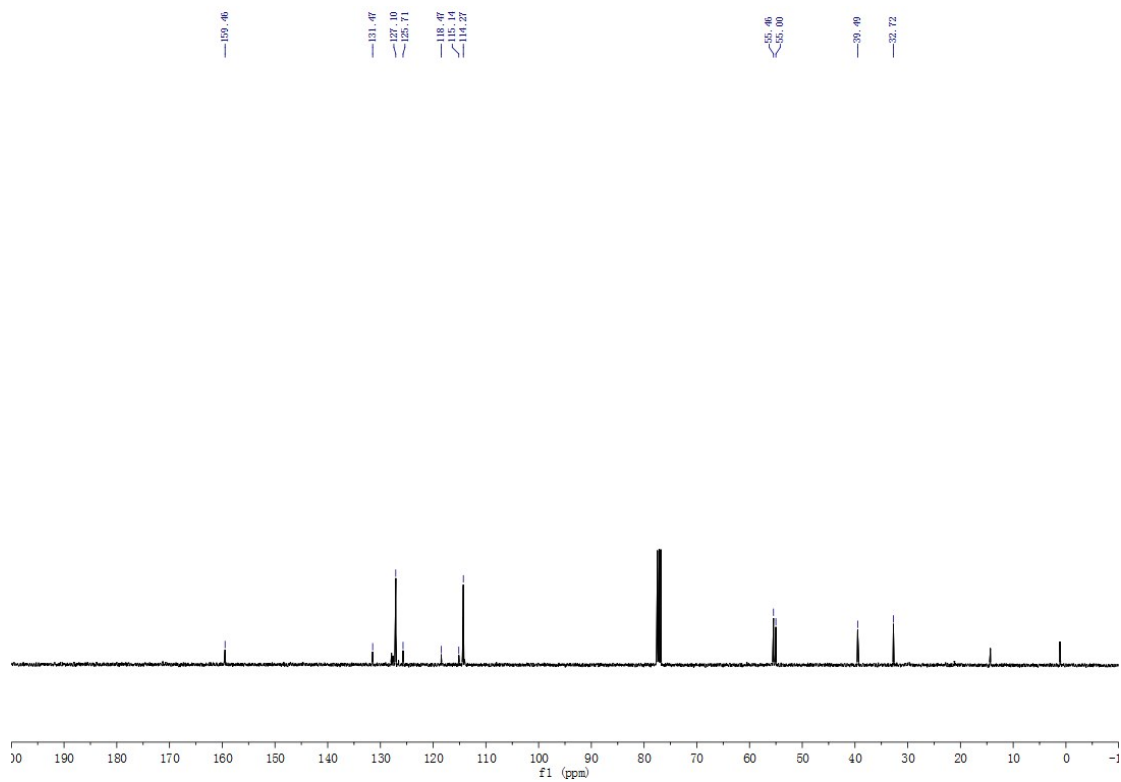

3-(4-fluorophenyl)-1-methyl-4,5-dihydro-1H-pyrrole-2-carbonitrile (4f)

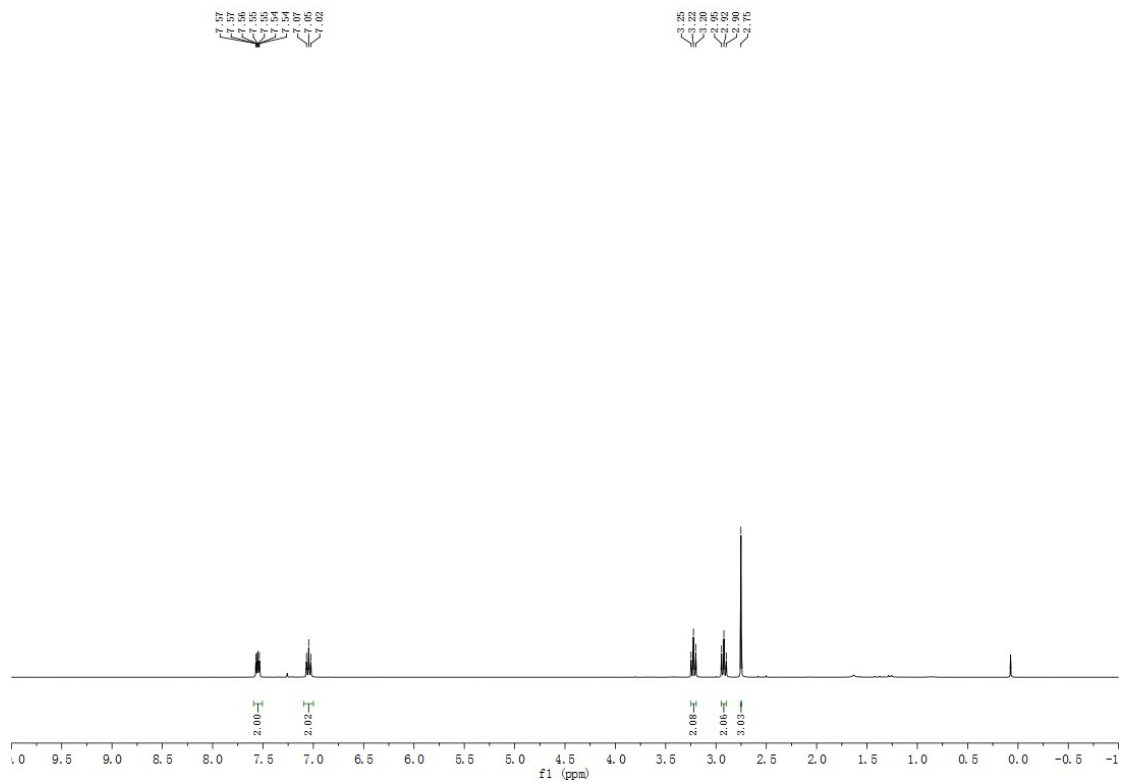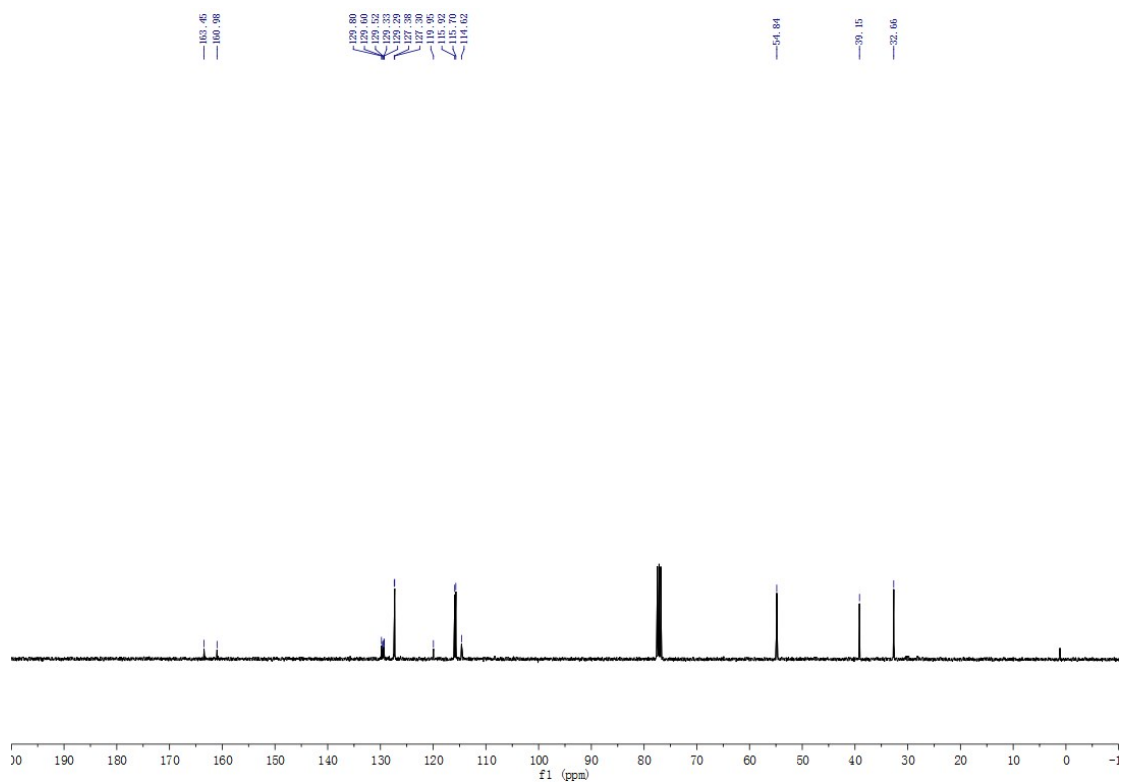



3-(4-chlorophenyl)-1-methyl-4,5-dihydro-1H-pyrrole-2-carbonitrile (4g)

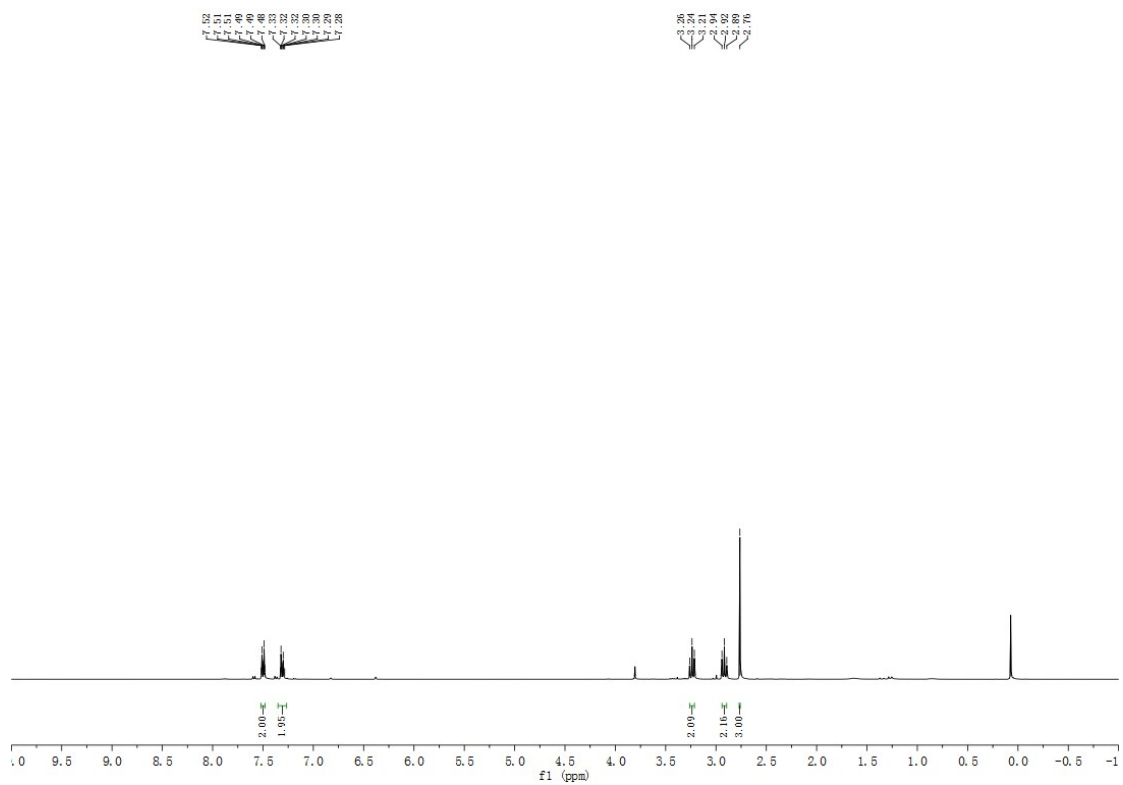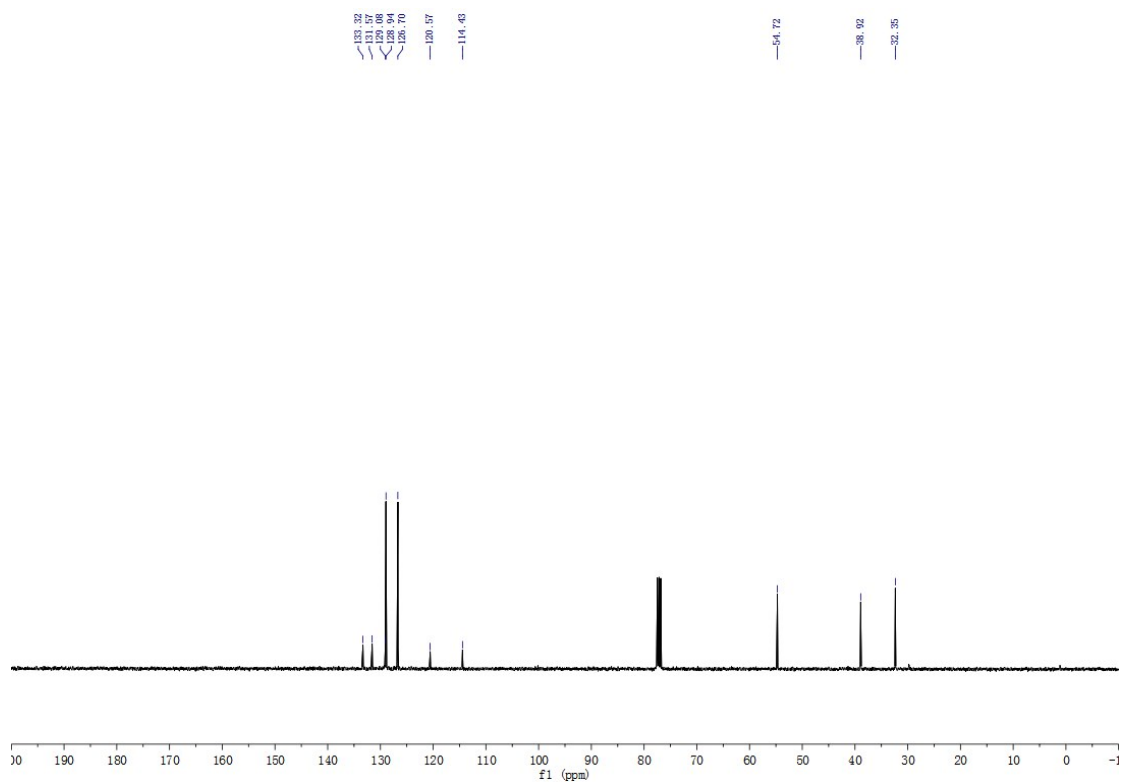

**3-(4-bromophenyl)-1-methyl-4,5-dihydro-1H-pyrrole-2-carbonitrile (4h)**

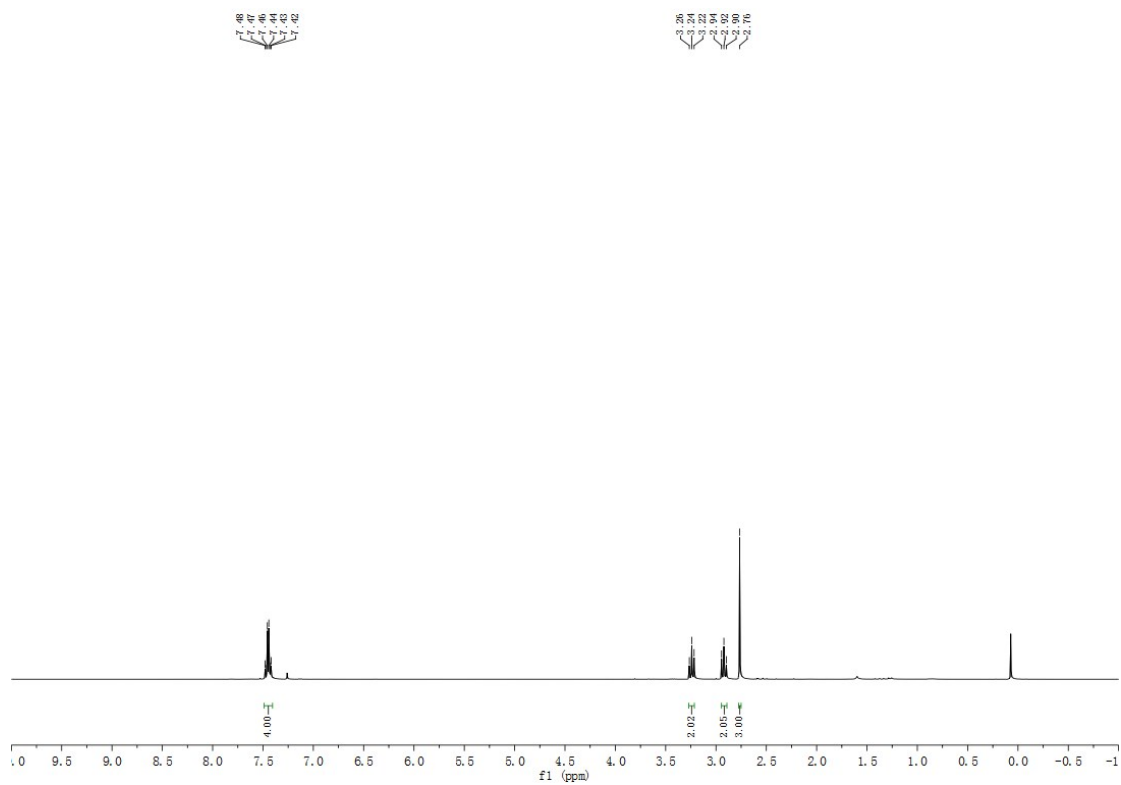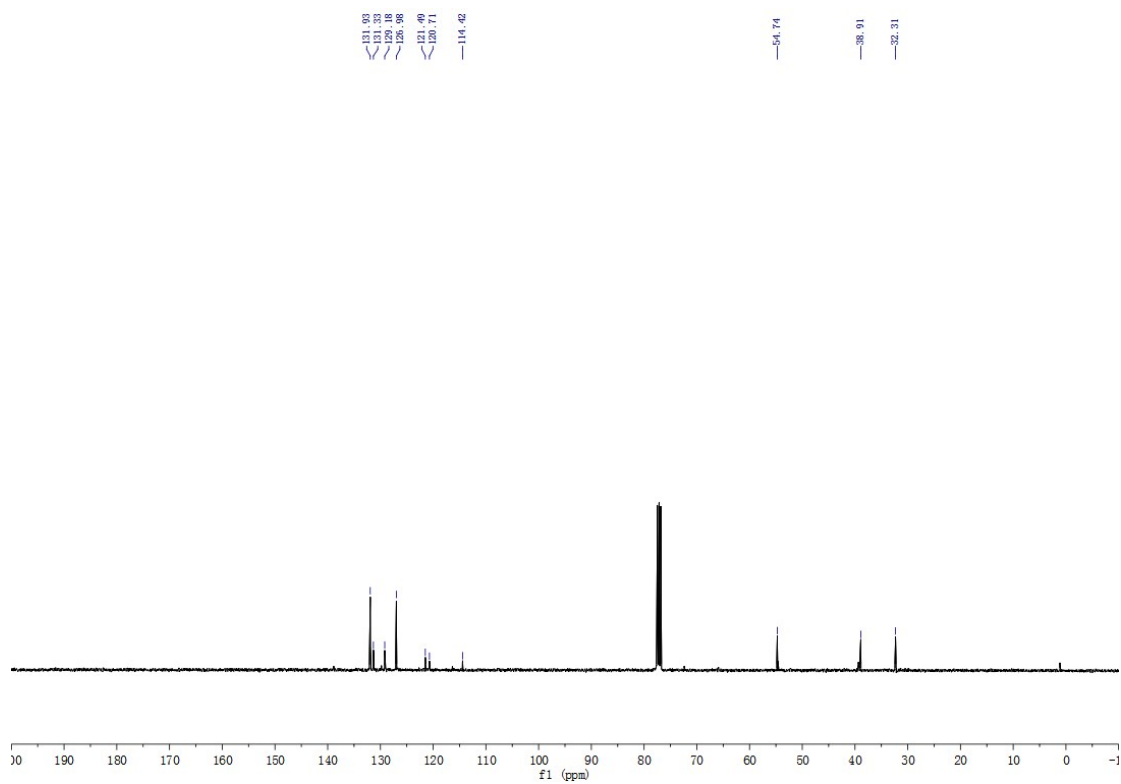

**3-(4-iodophenyl)-1-methyl-4,5-dihydro-1H-pyrrole-2-carbonitrile (4i)**

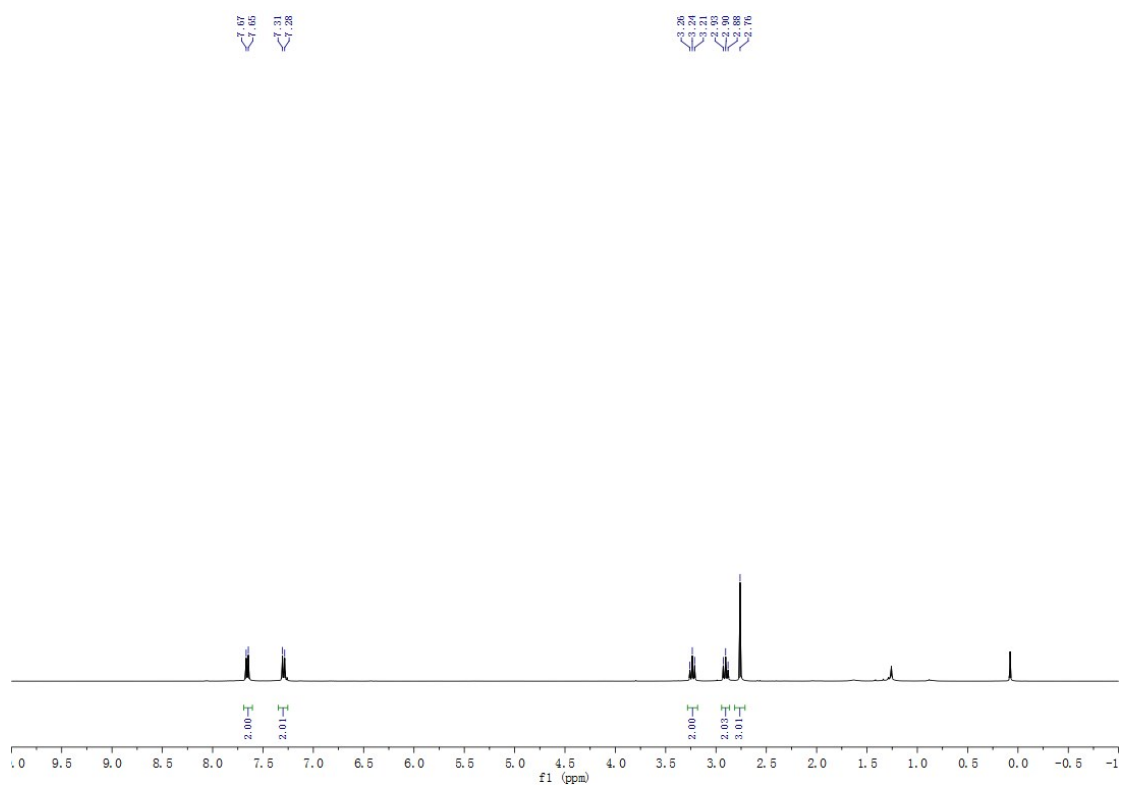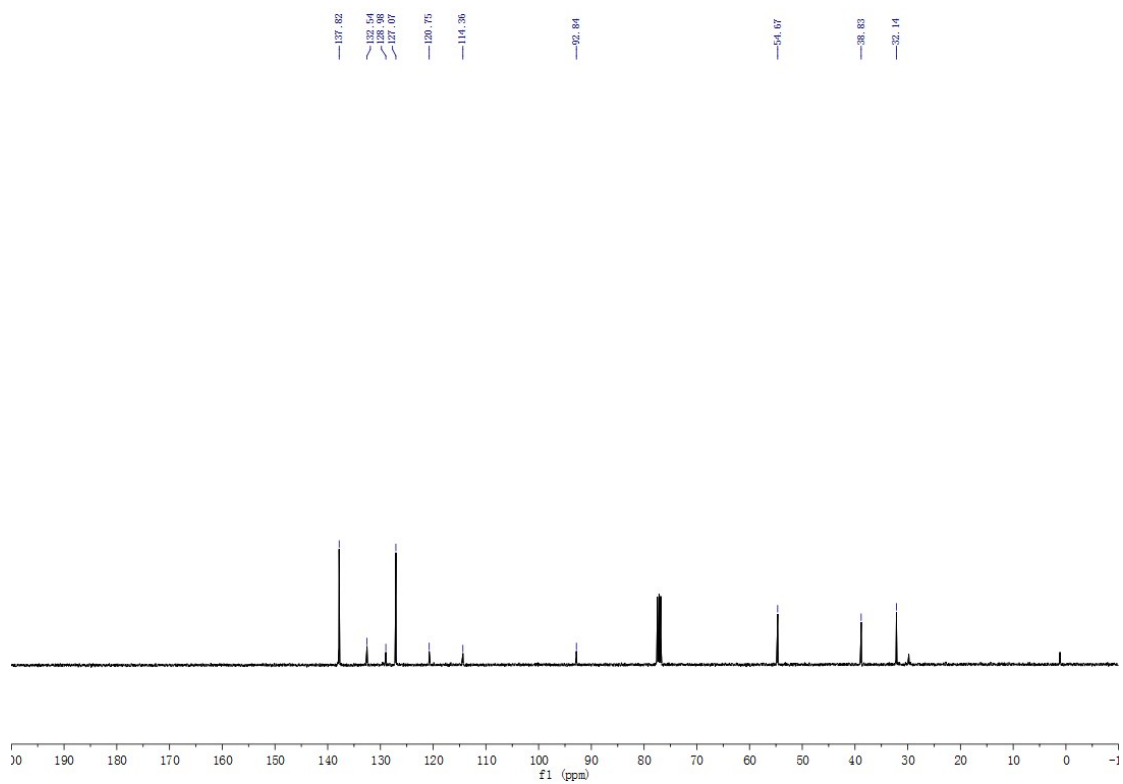

*1-methyl-3-(4-(trifluoromethyl)phenyl)-4,5-dihydro-1H-pyrrole-2-carbonitrile (4j)*

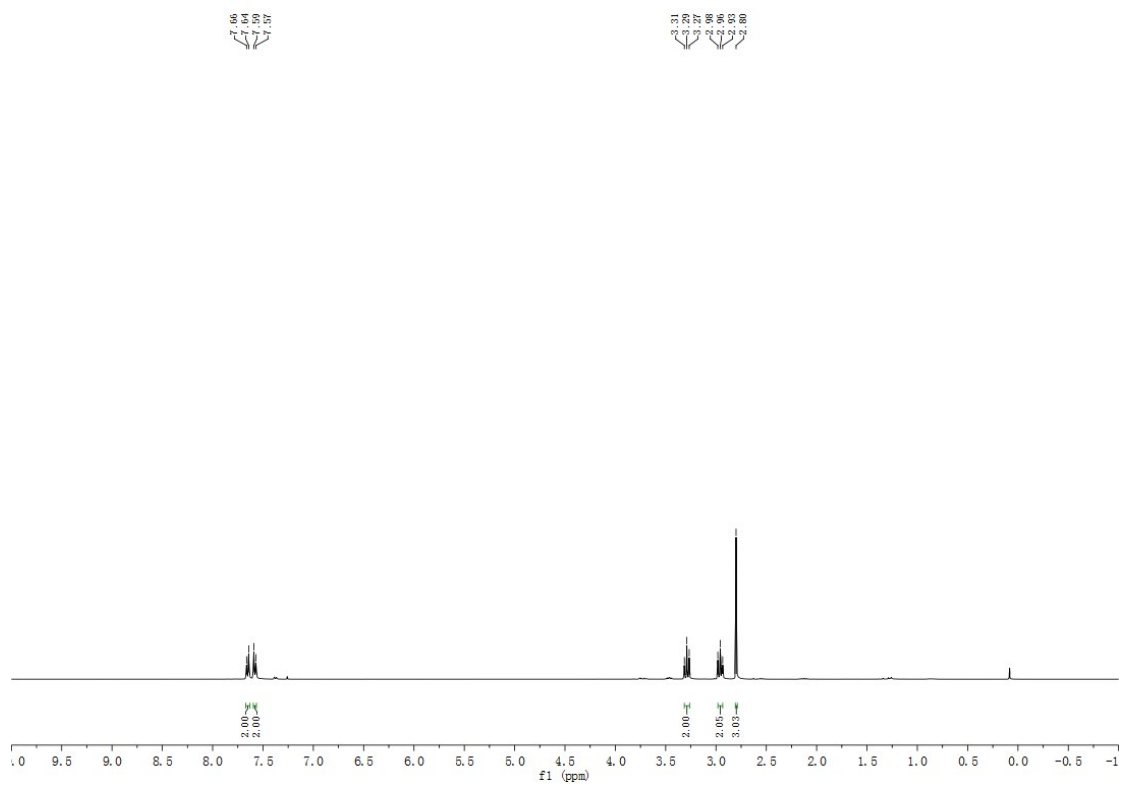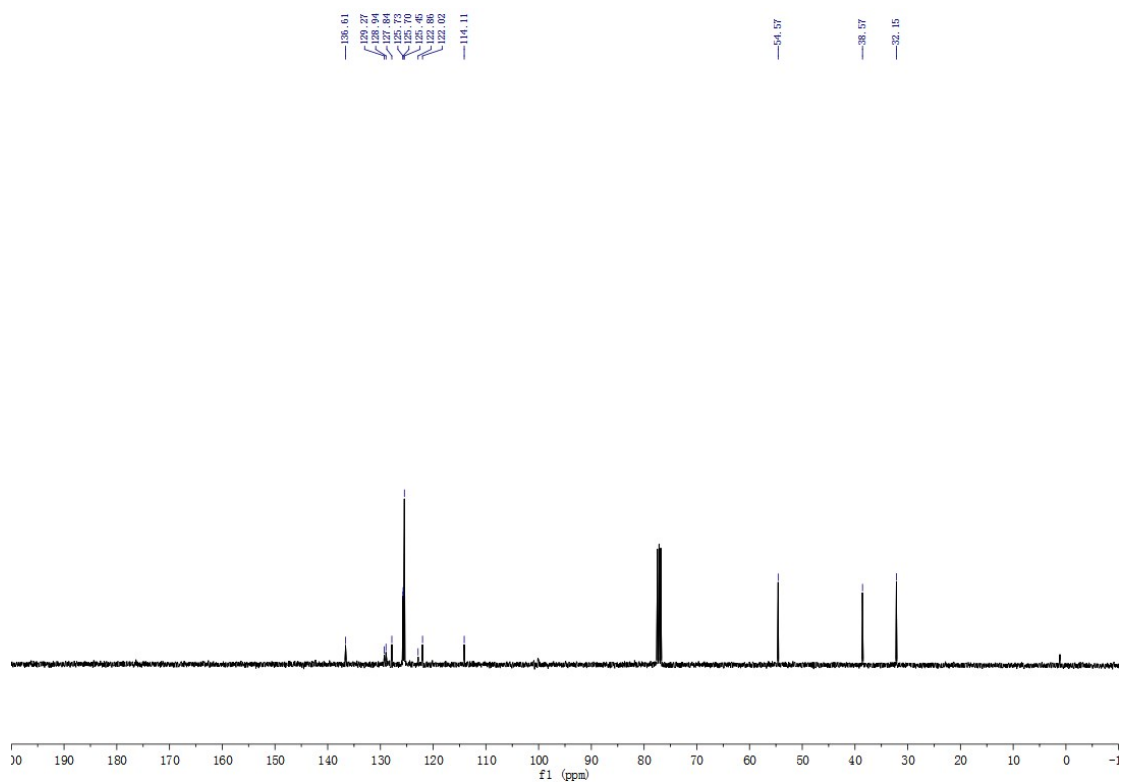

**3-(4-formylphenyl)-1-methyl-4,5-dihydro-1H-pyrrole-2-carbonitrile (4k)**

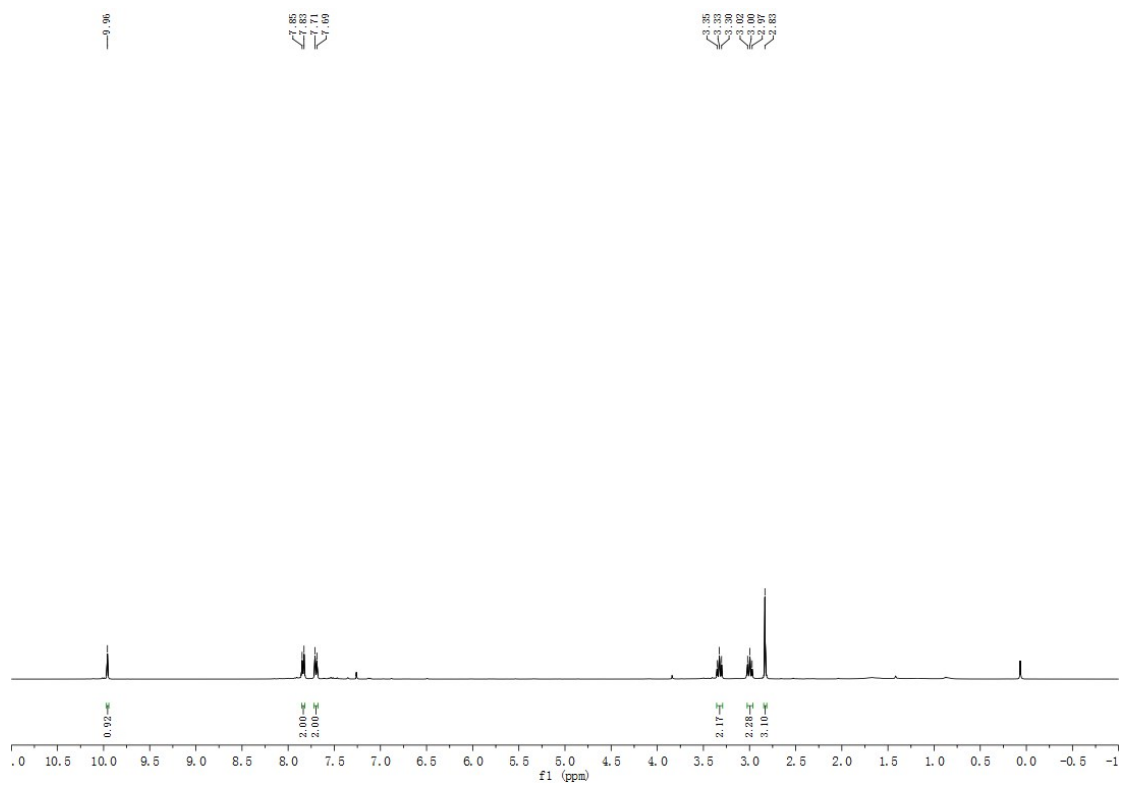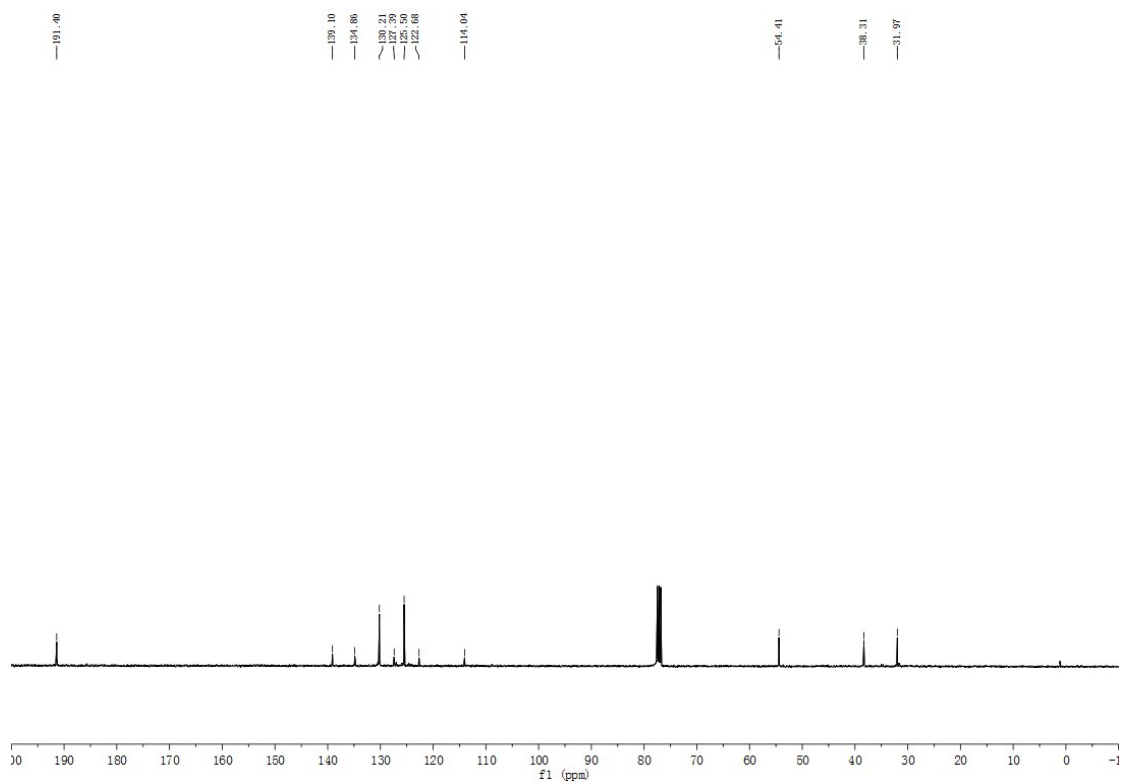

4-(2-cyano-1-methyl-4,5-dihydro-1H-pyrrol-3-yl)benzoic acid (4l)

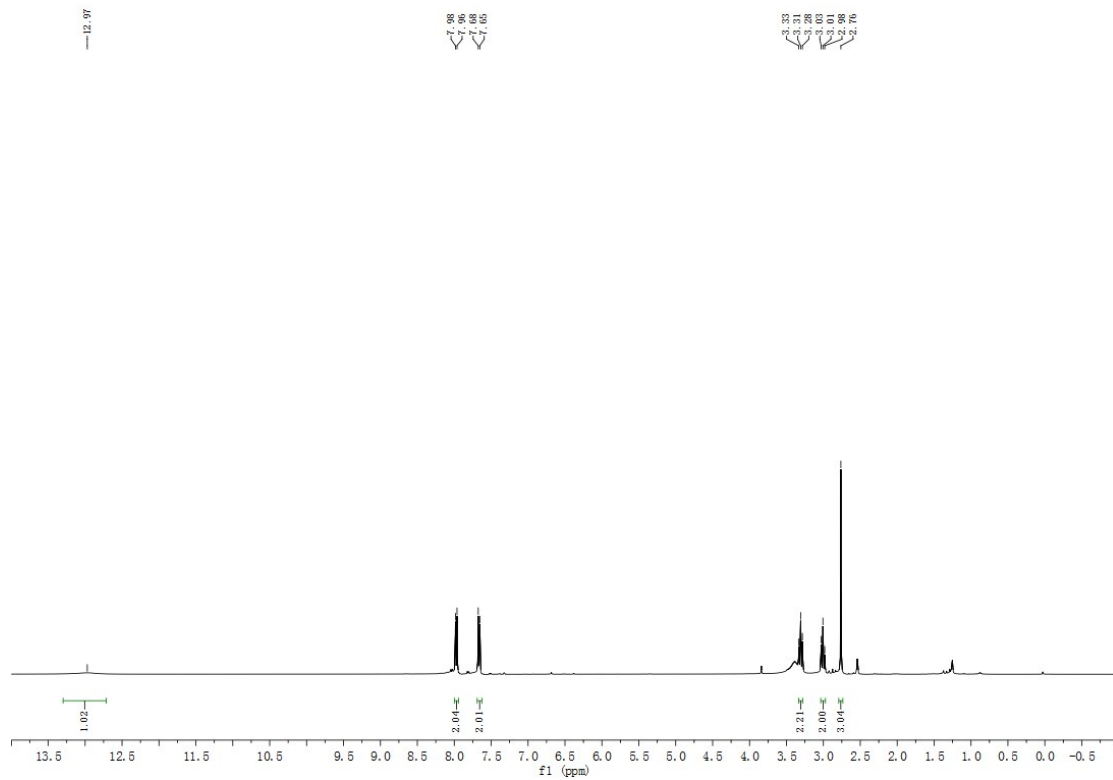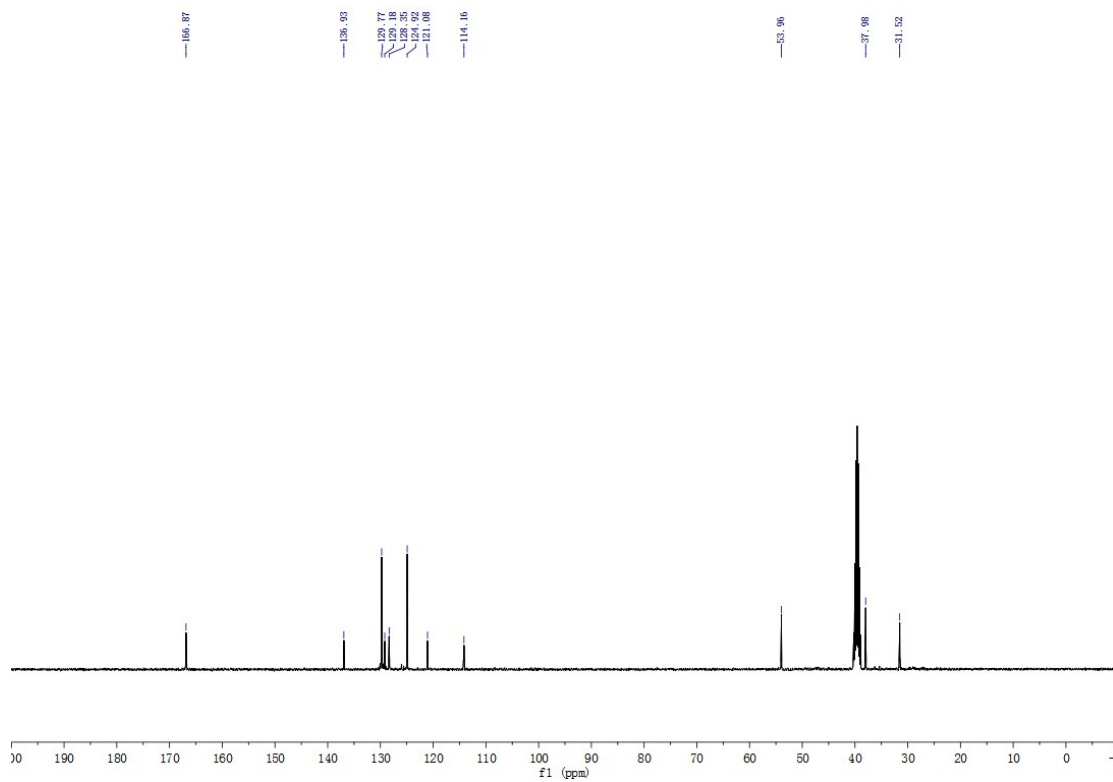

4-(2-cyano-1-methyl-4,5-dihydro-1H-pyrrol-3-yl)phenyl acetate (4m)

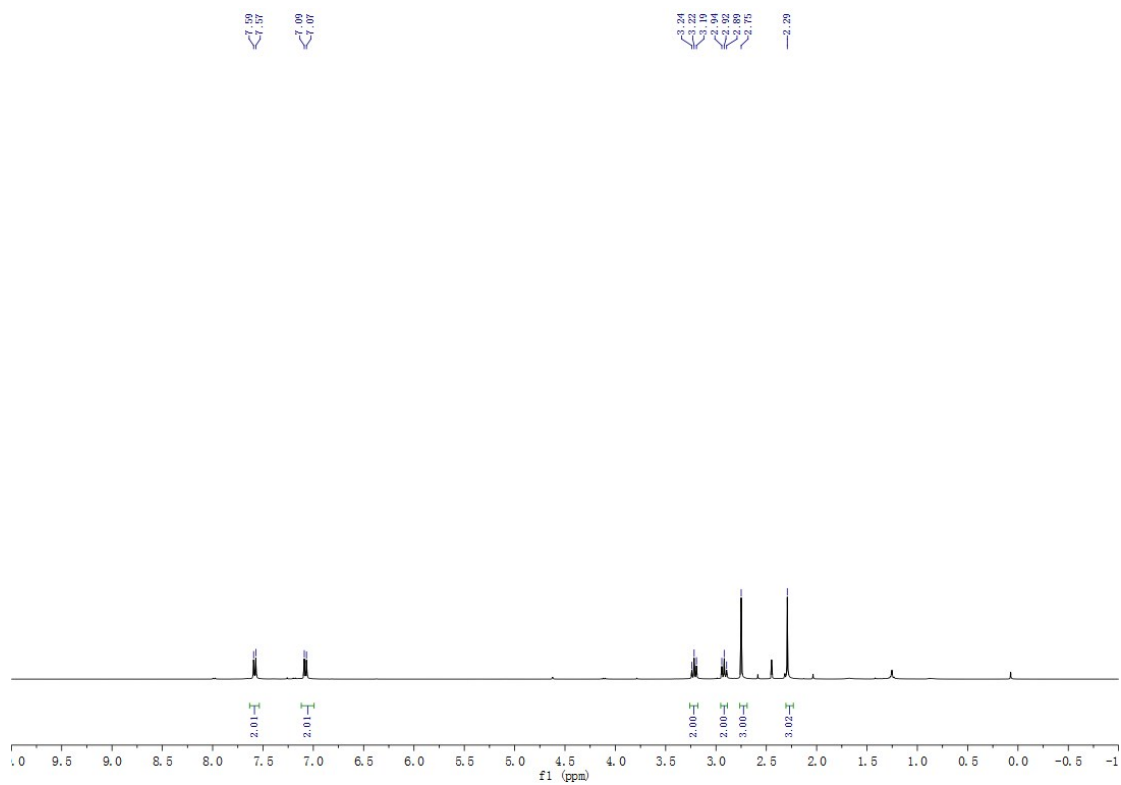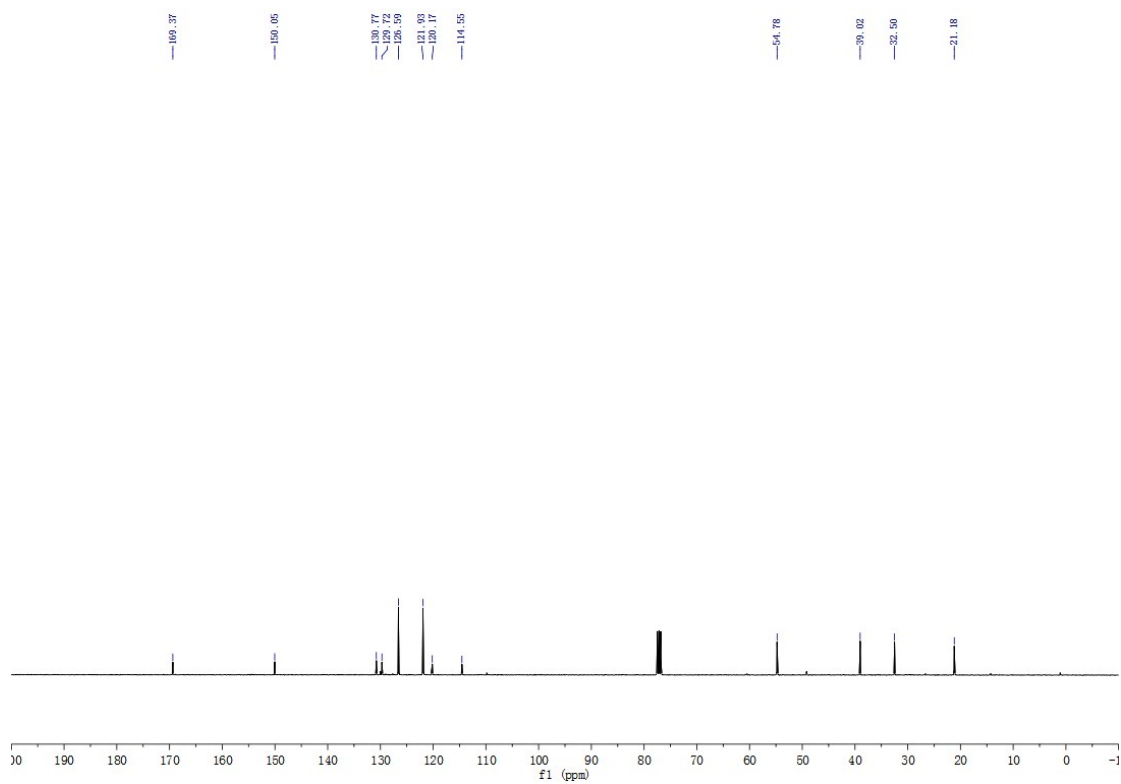

3-(4-cyanophenyl)-1-methyl-4,5-dihydro-1H-pyrrole-2-carbonitrile (4n)

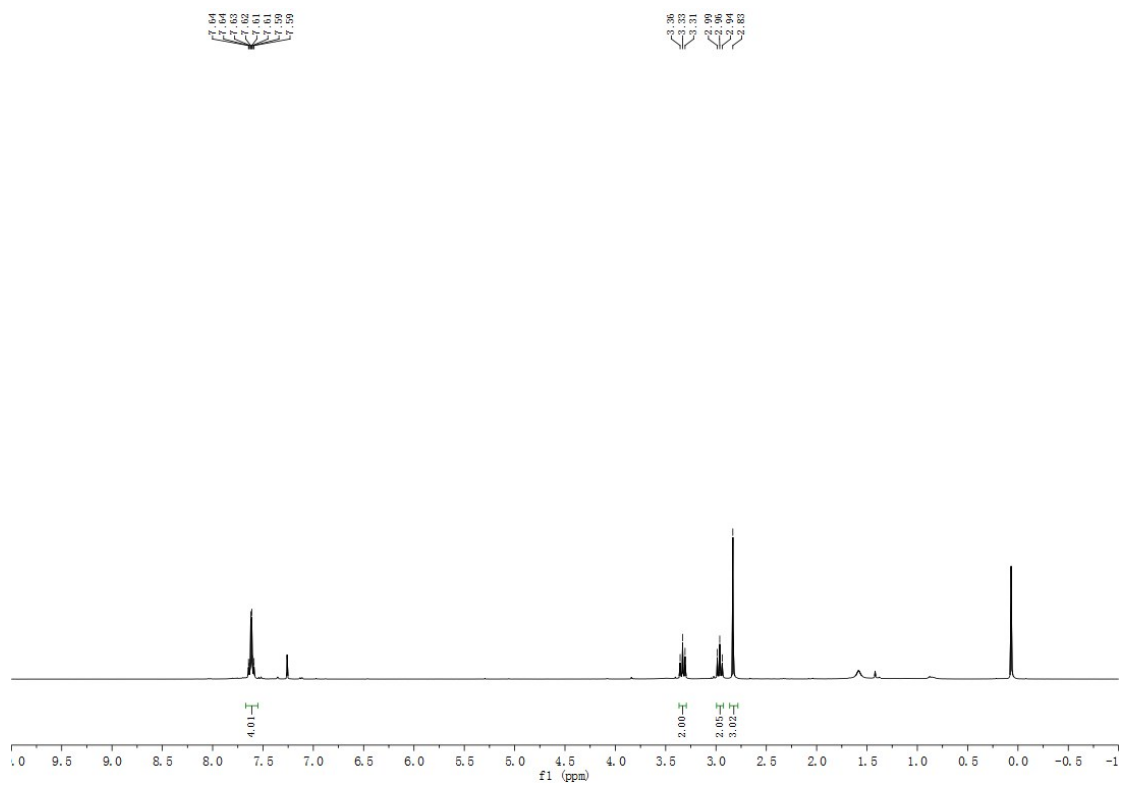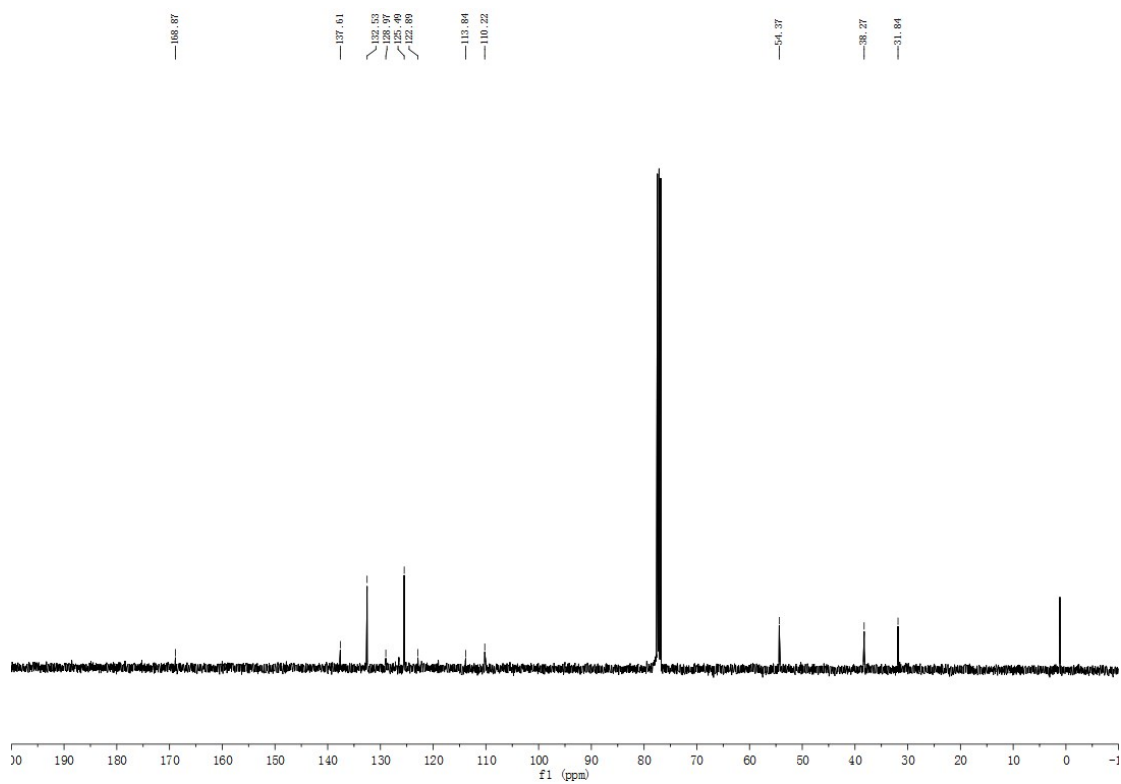



*1-methyl-3-(4-nitrophenyl)-4,5-dihydro-1H-pyrrole-2-carbonitrile (4o)*

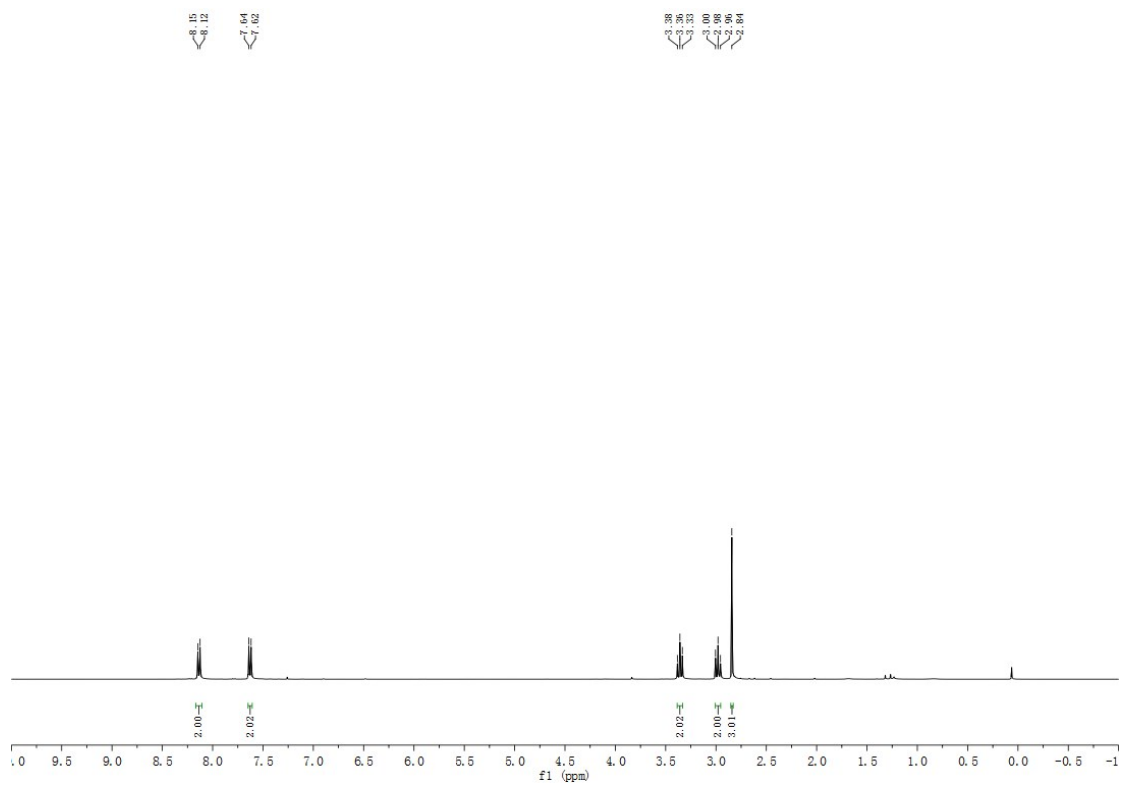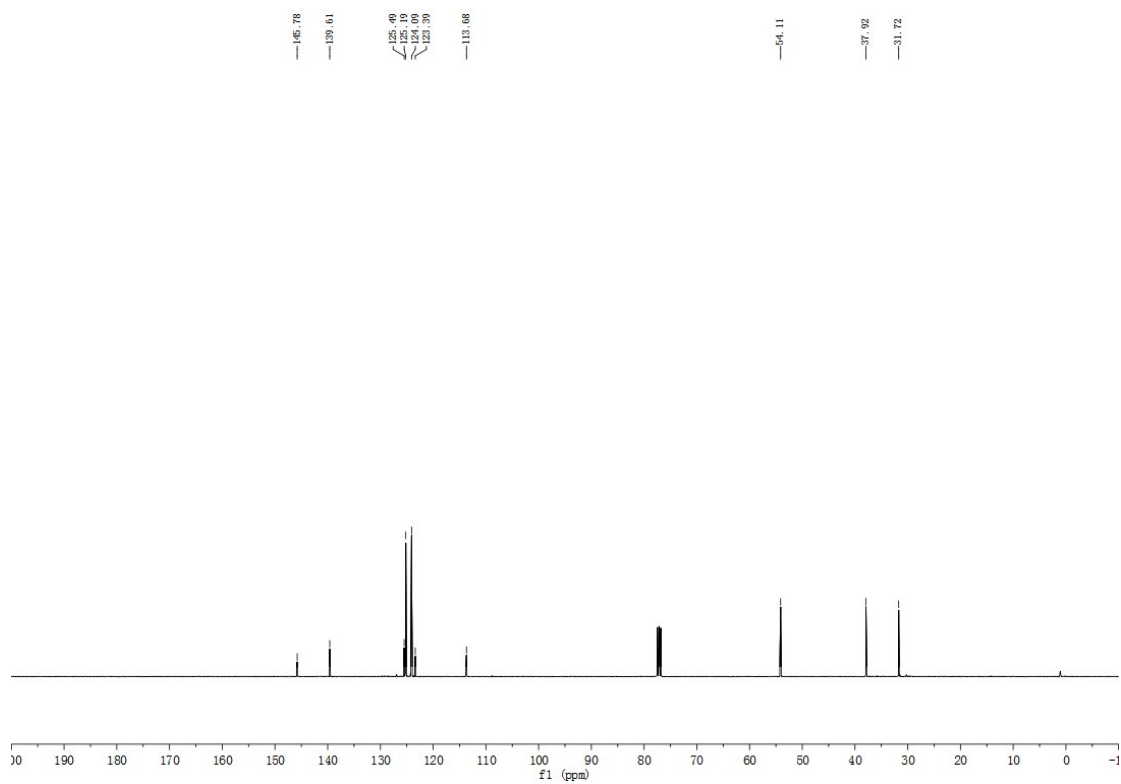

*1-methyl-3-(m-tolyl)-4,5-dihydro-1H-pyrrole-2-carbonitrile (4p)*

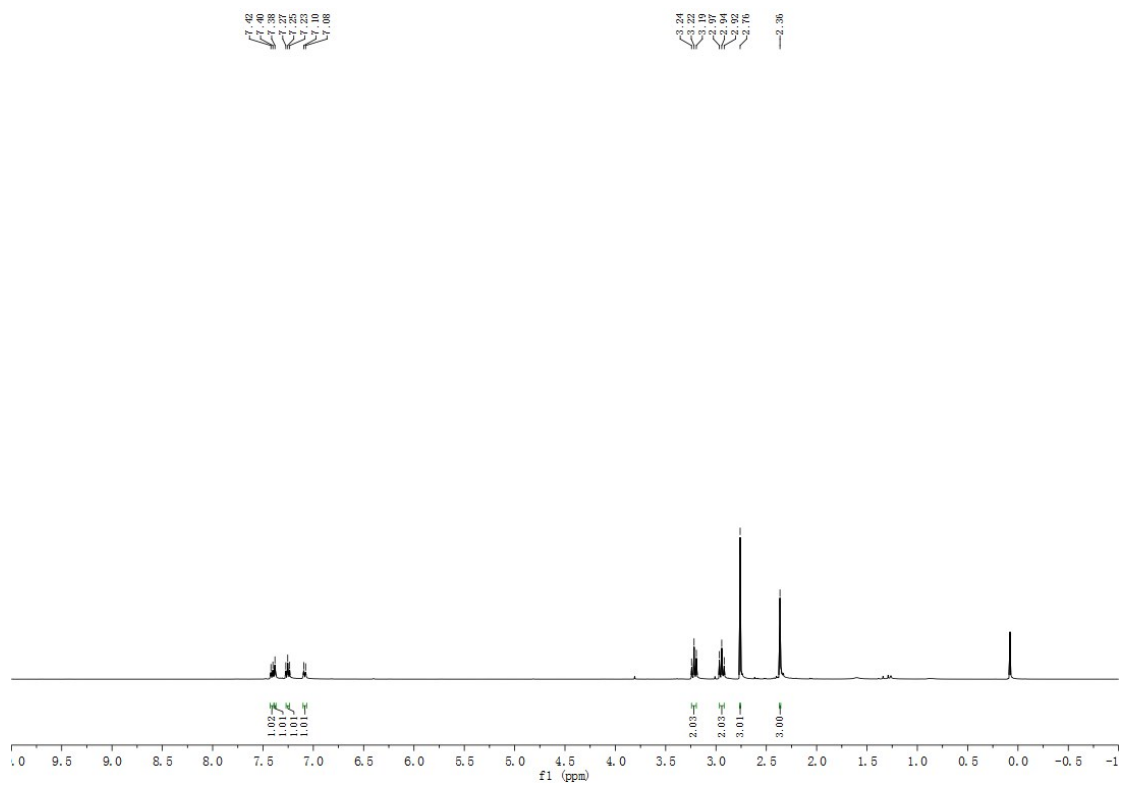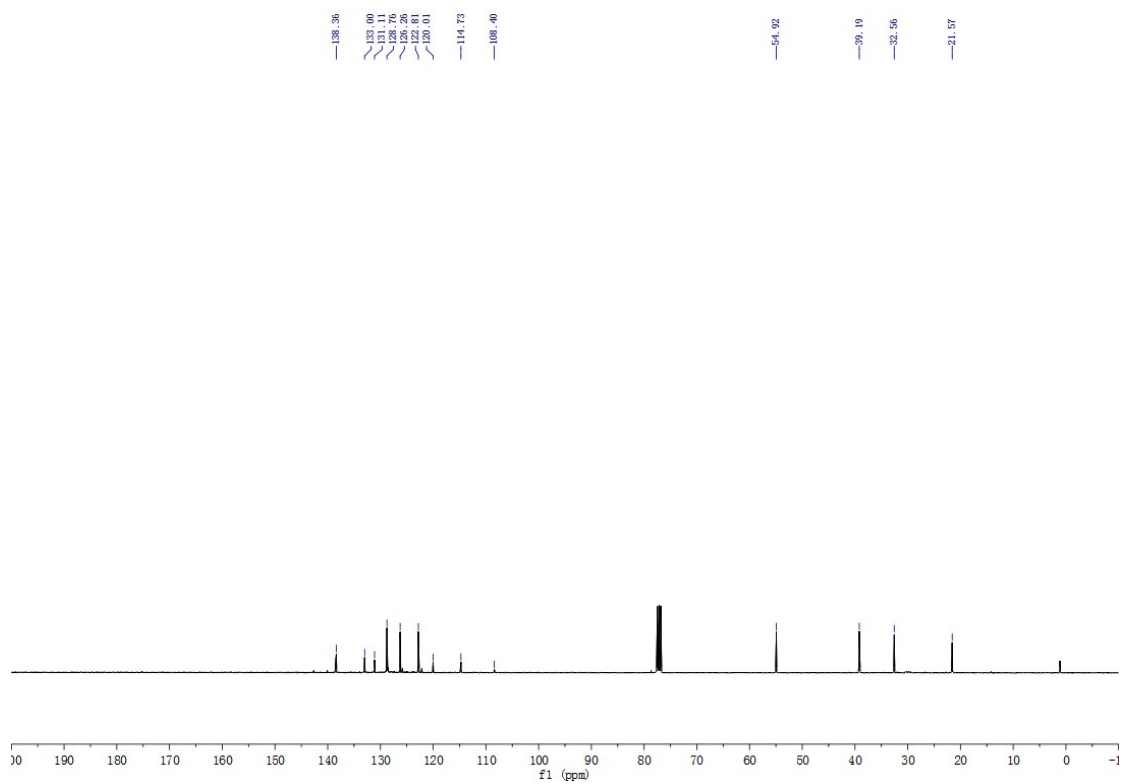

*1-methyl-3-(o-tolyl)-4,5-dihydro-1H-pyrrole-2-carbonitrile (4q)*

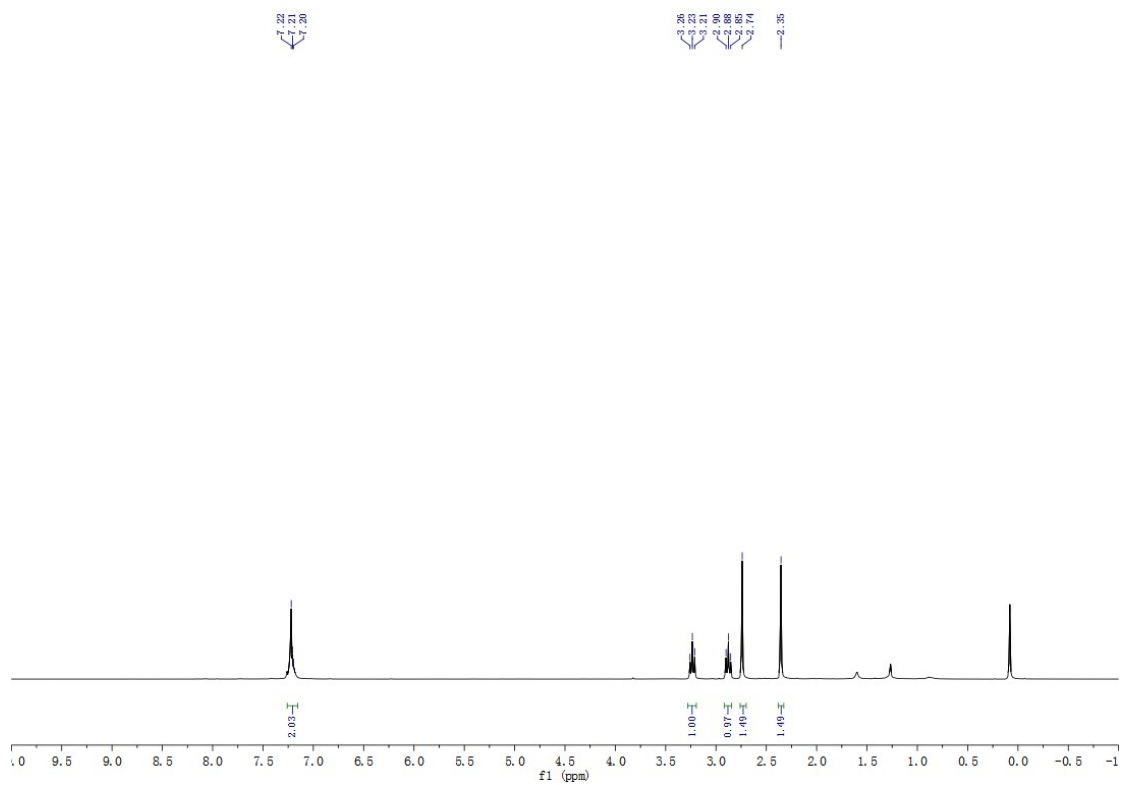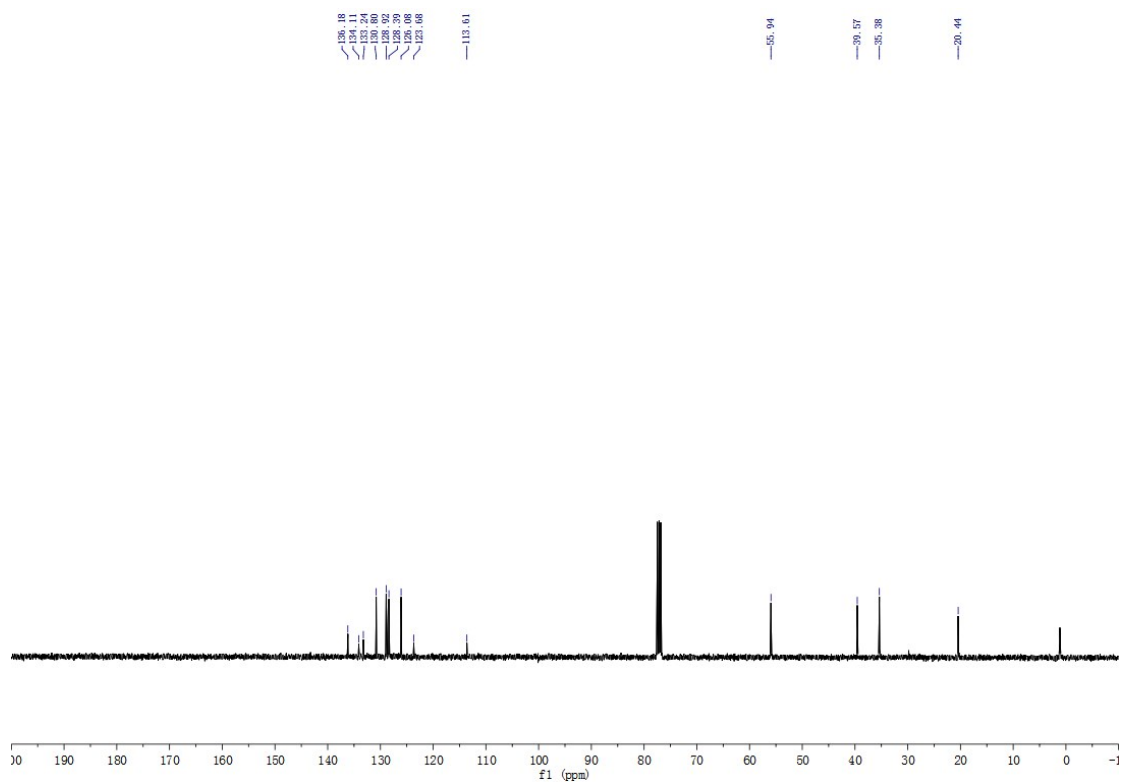

3-(2-chlorophenyl)-1-methyl-4,5-dihydro-1H-pyrrole-2-carbonitrile (4r)

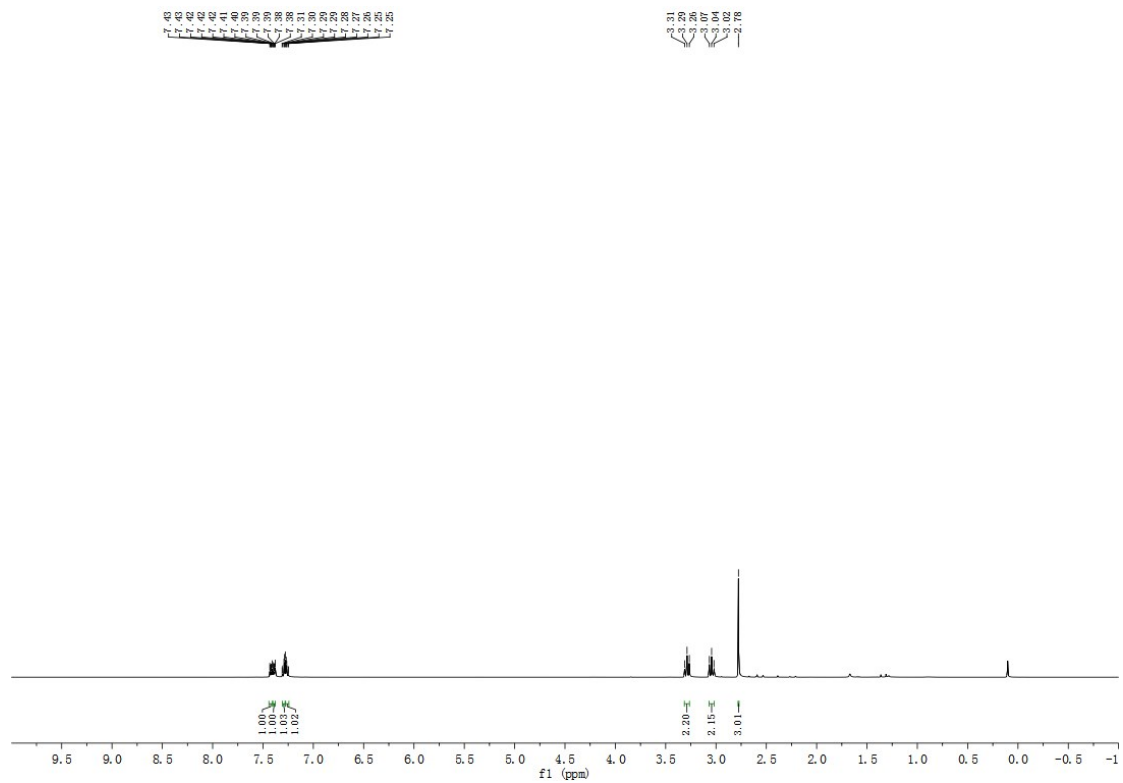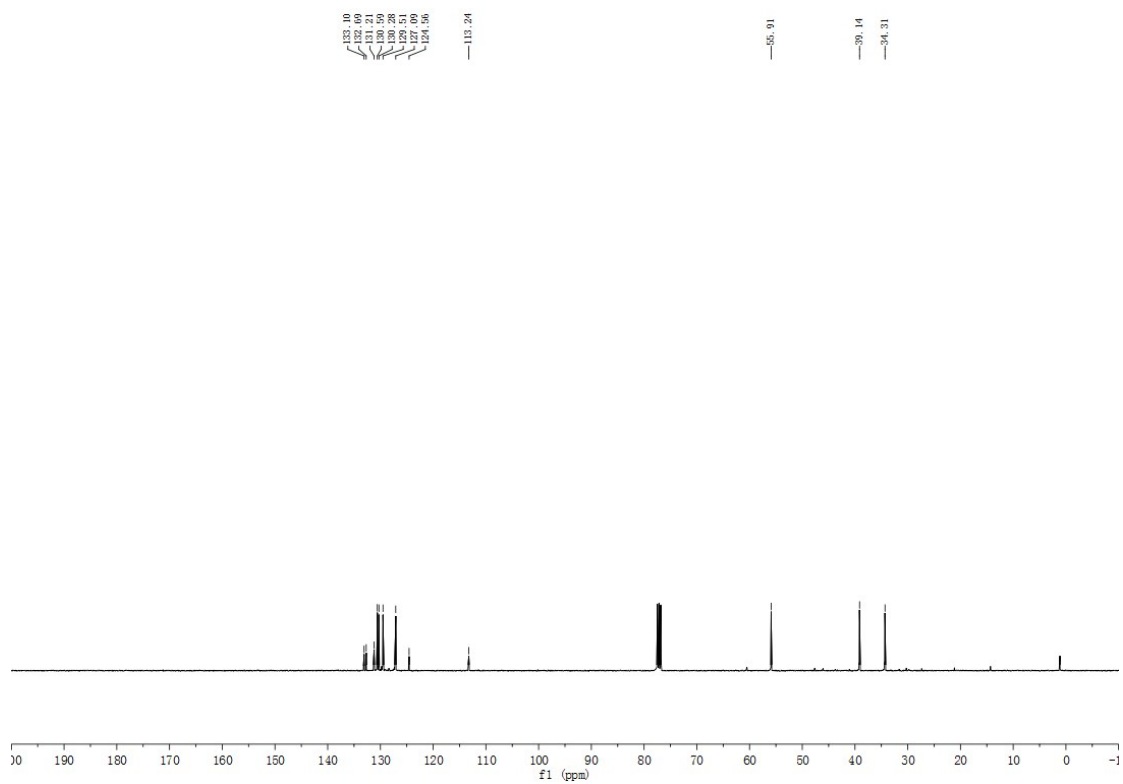

*1-methyl-3-(4-vinylphenyl)-4,5-dihydro-1H-pyrrole-2-carbonitrile (4s)*

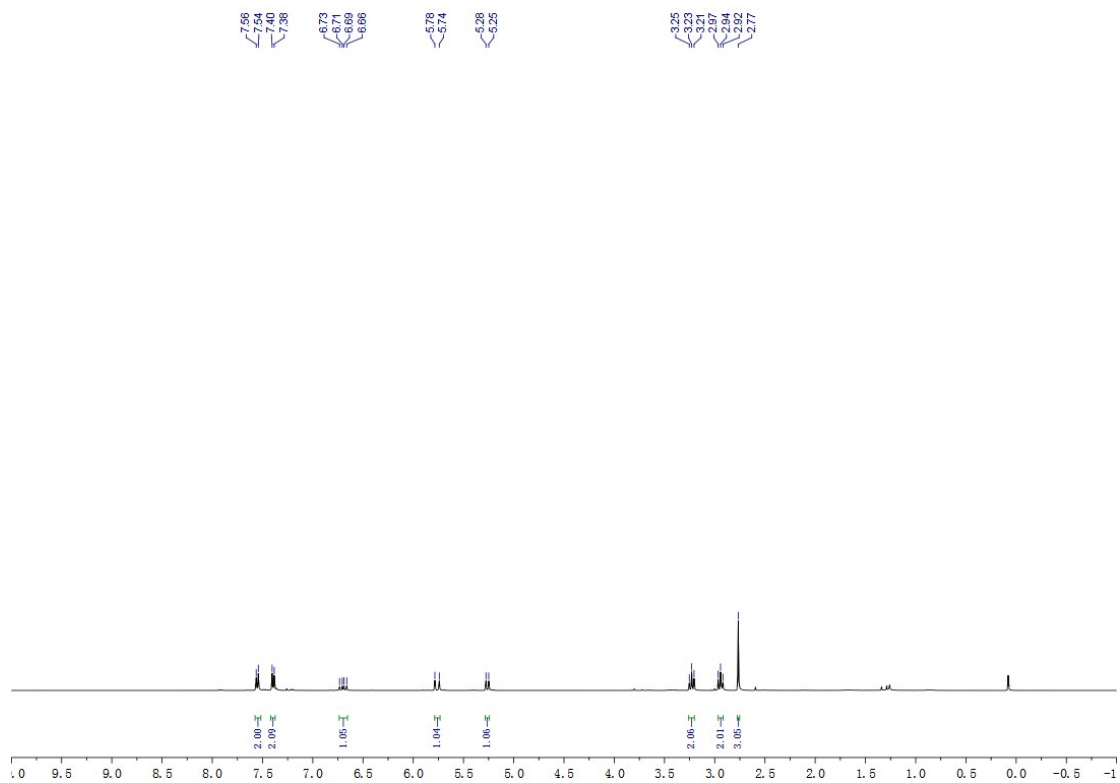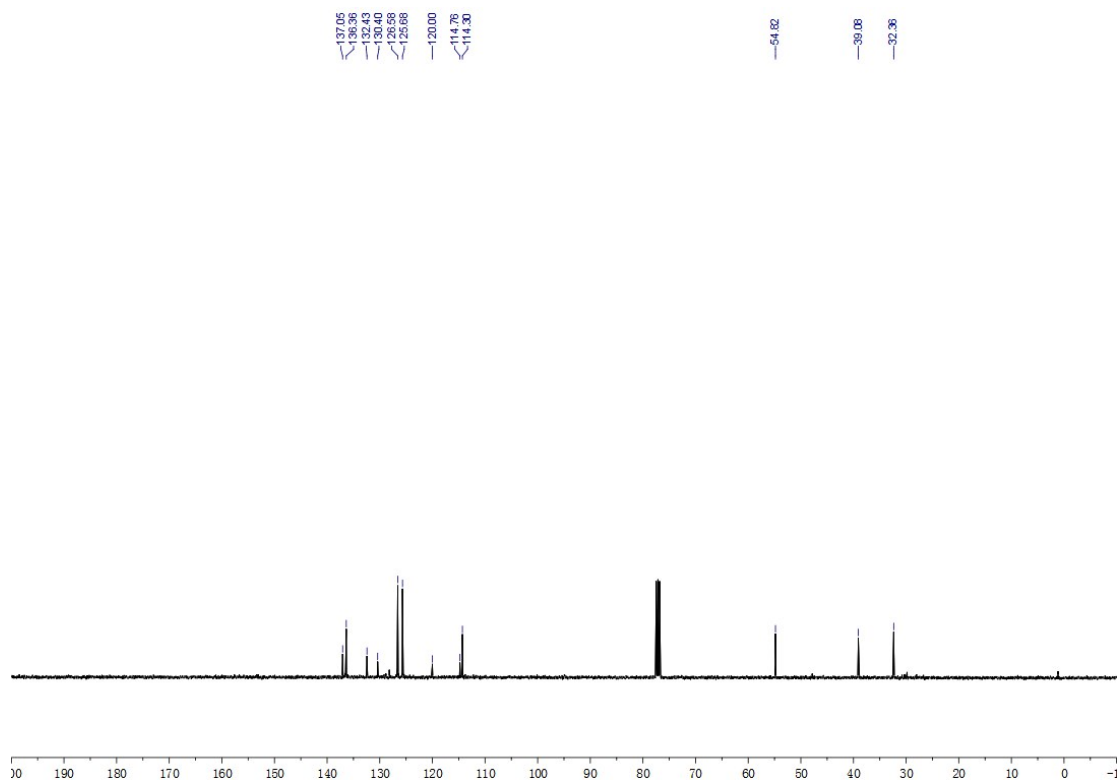

*3-(4-hydroxy-3-methoxyphenyl)-1-methyl-4,5-dihydro-1H-pyrrole-2-carbonitrile (4t)*

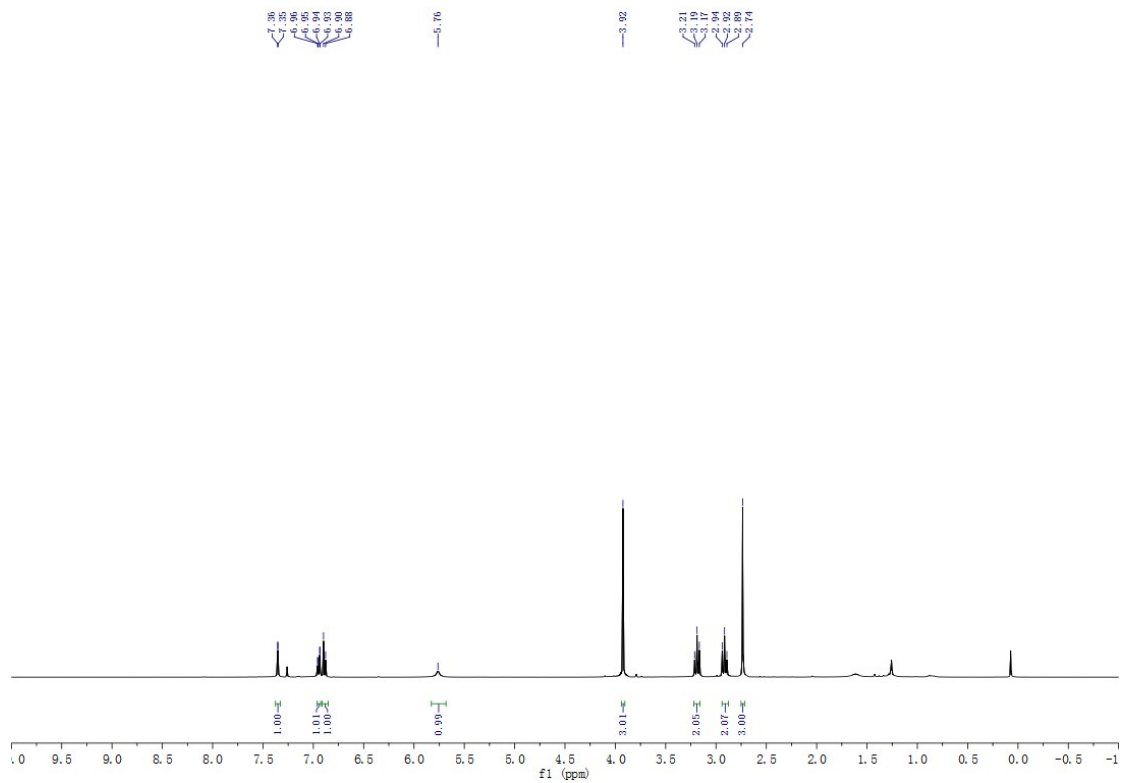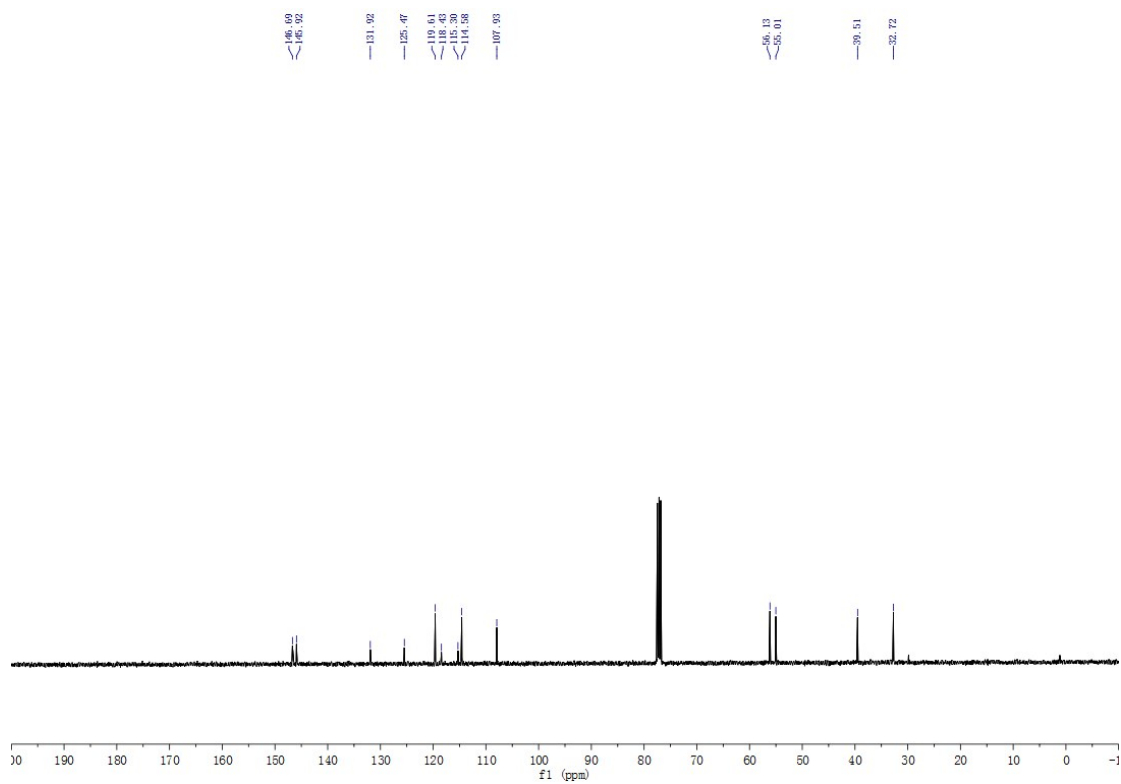

*1-methyl-3-(naphthalen-2-yl)-4,5-dihydro-1H-pyrrole-2-carbonitrile (4u)*

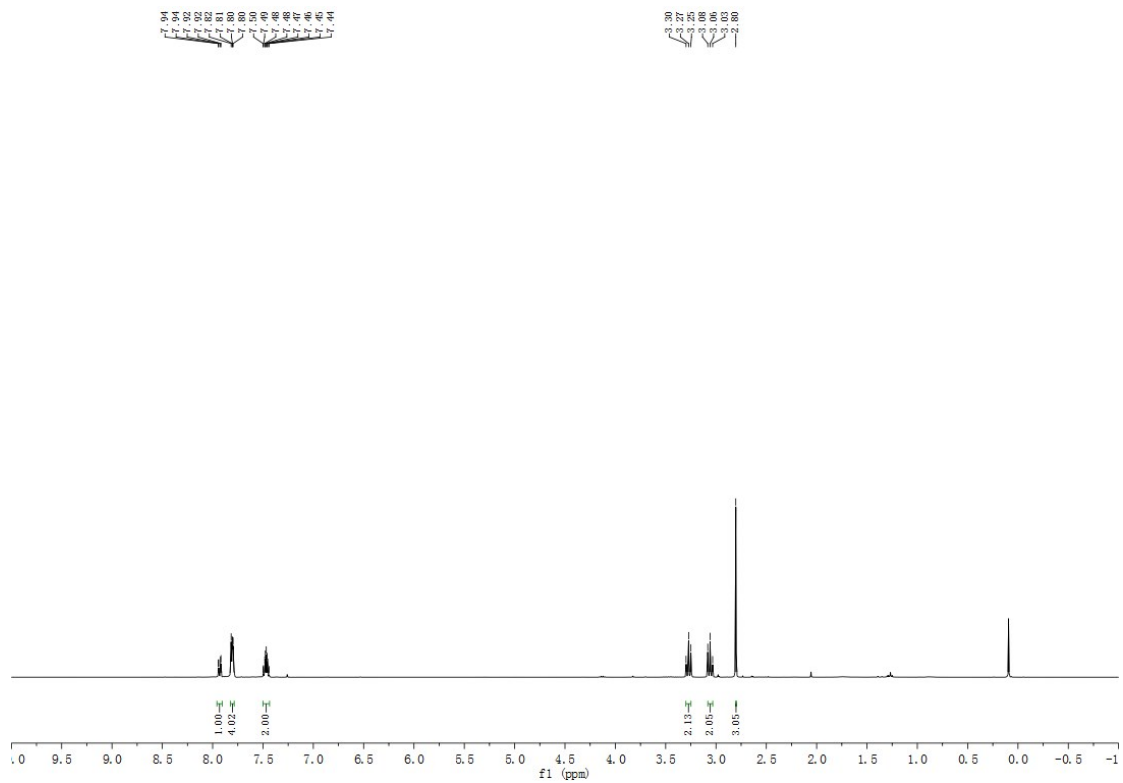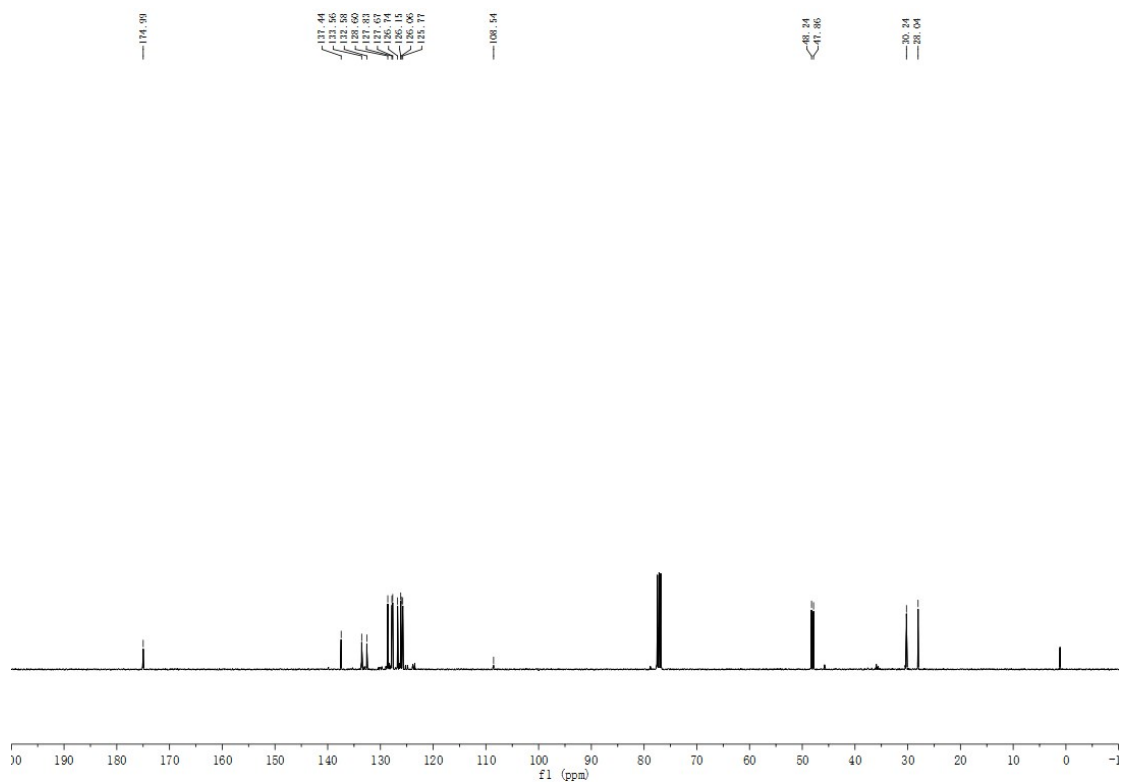

*1-methyl-3-(pyridin-2-yl)-4,5-dihydro-1H-pyrrole-2-carbonitrile (4v)*

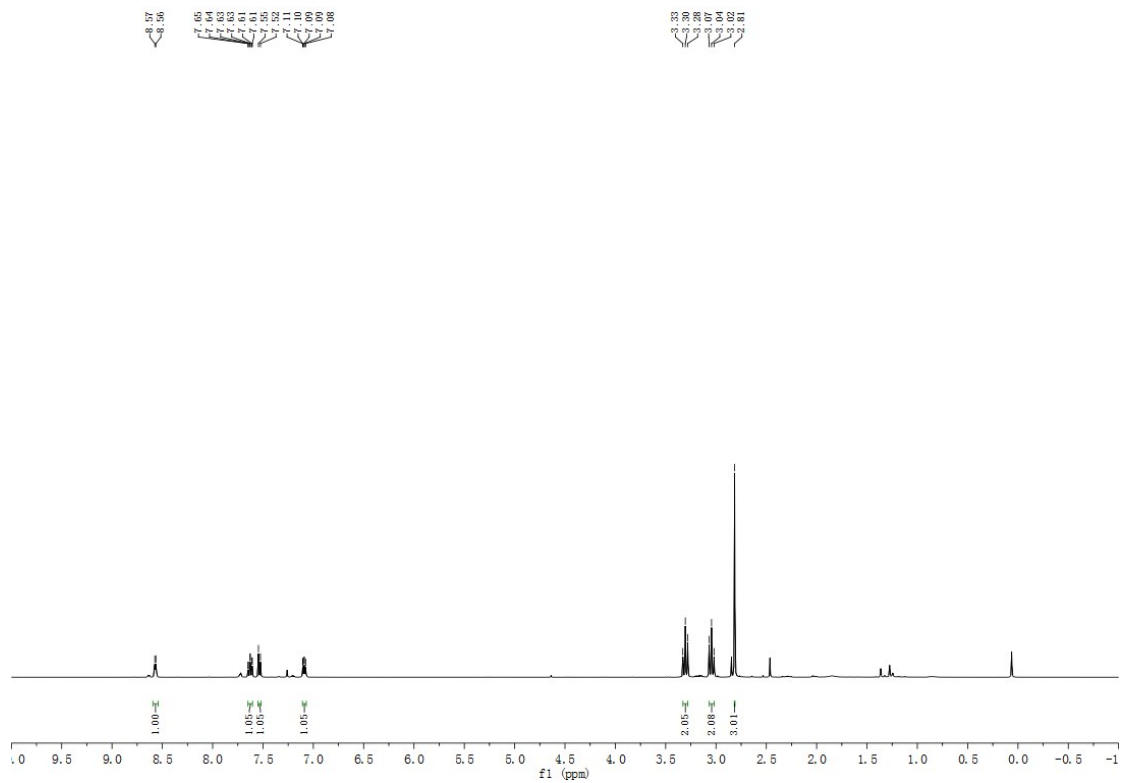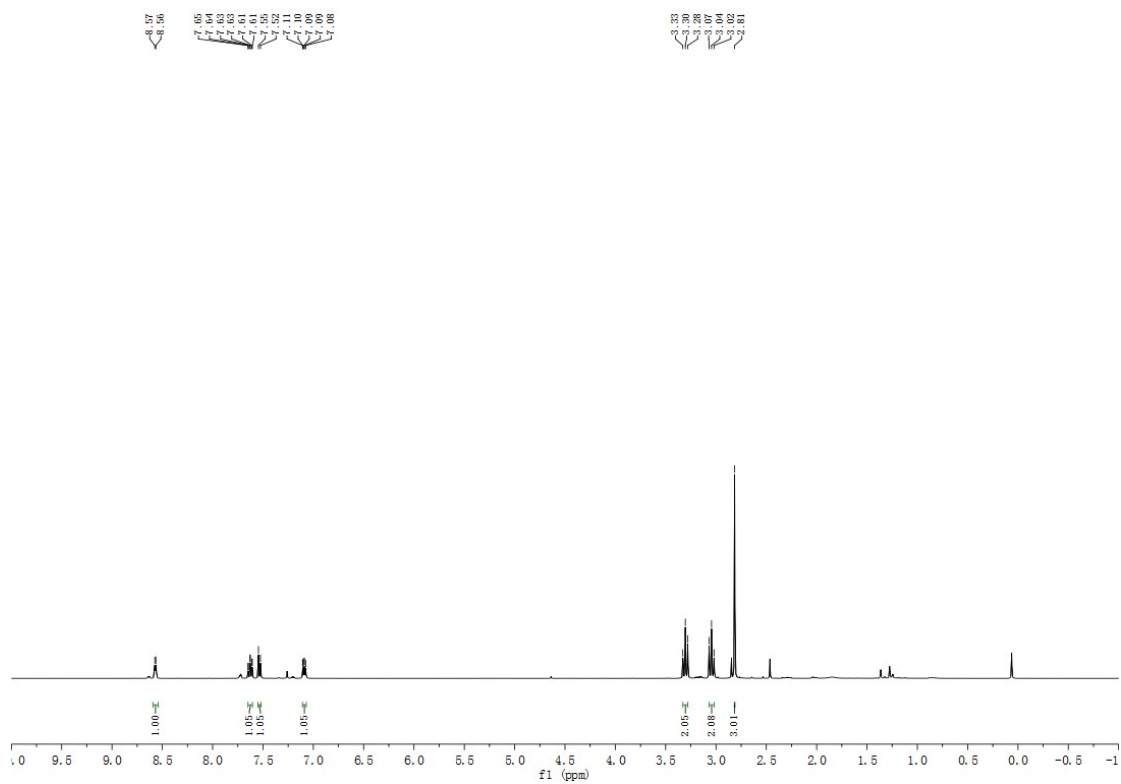



*1,4-dimethyl-3-phenyl-1H-pyrrole-2-carbonitrile (4w)*

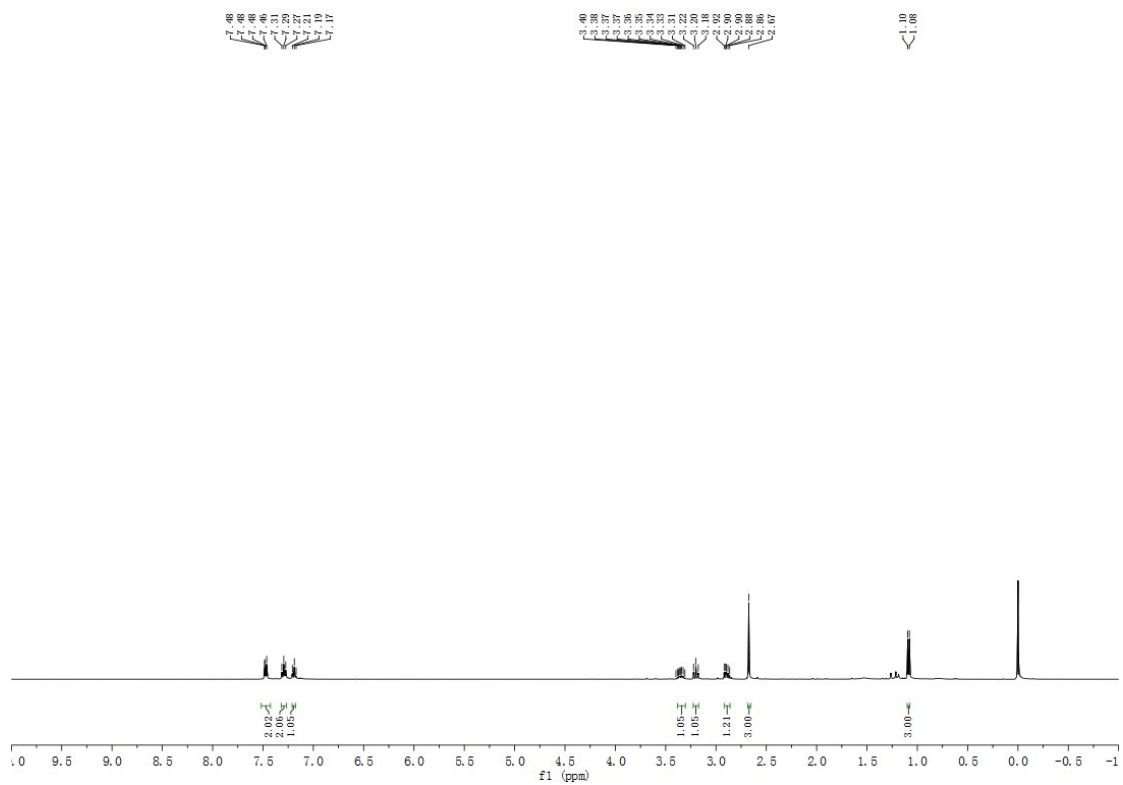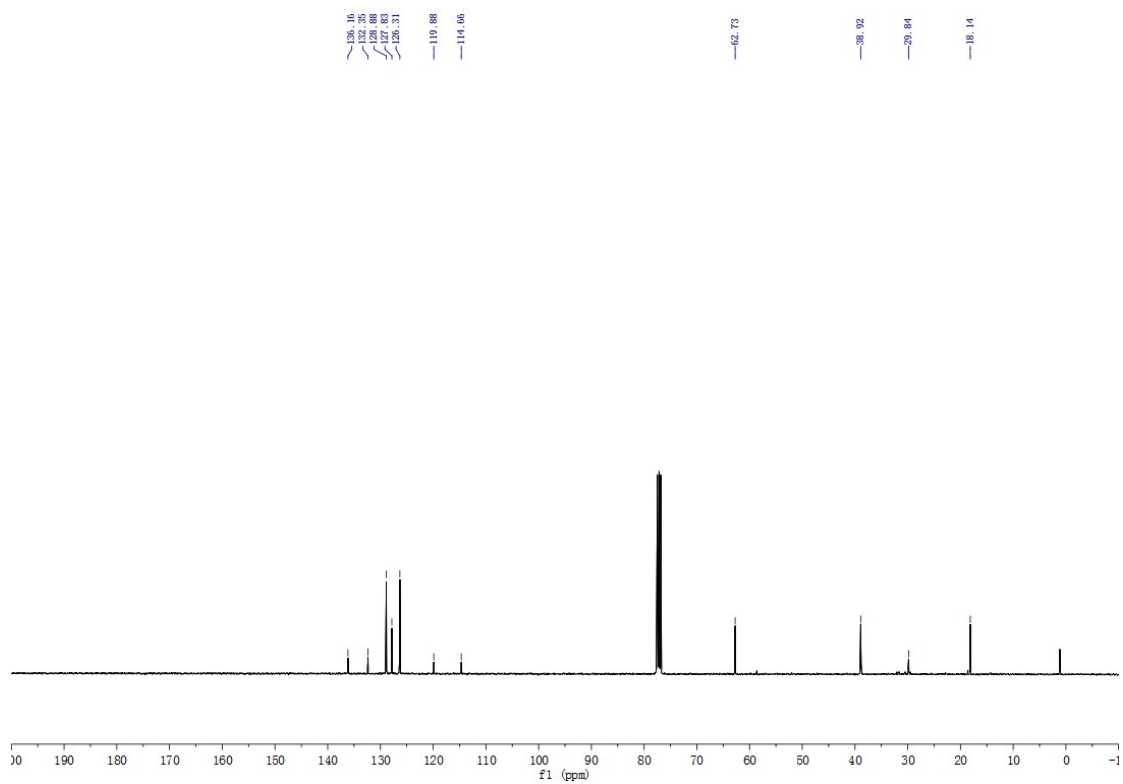

**2-methyl-1,2,8,8a-tetrahydroindeno[1,2-c]pyrrole-3-carbonitrile (4x)**

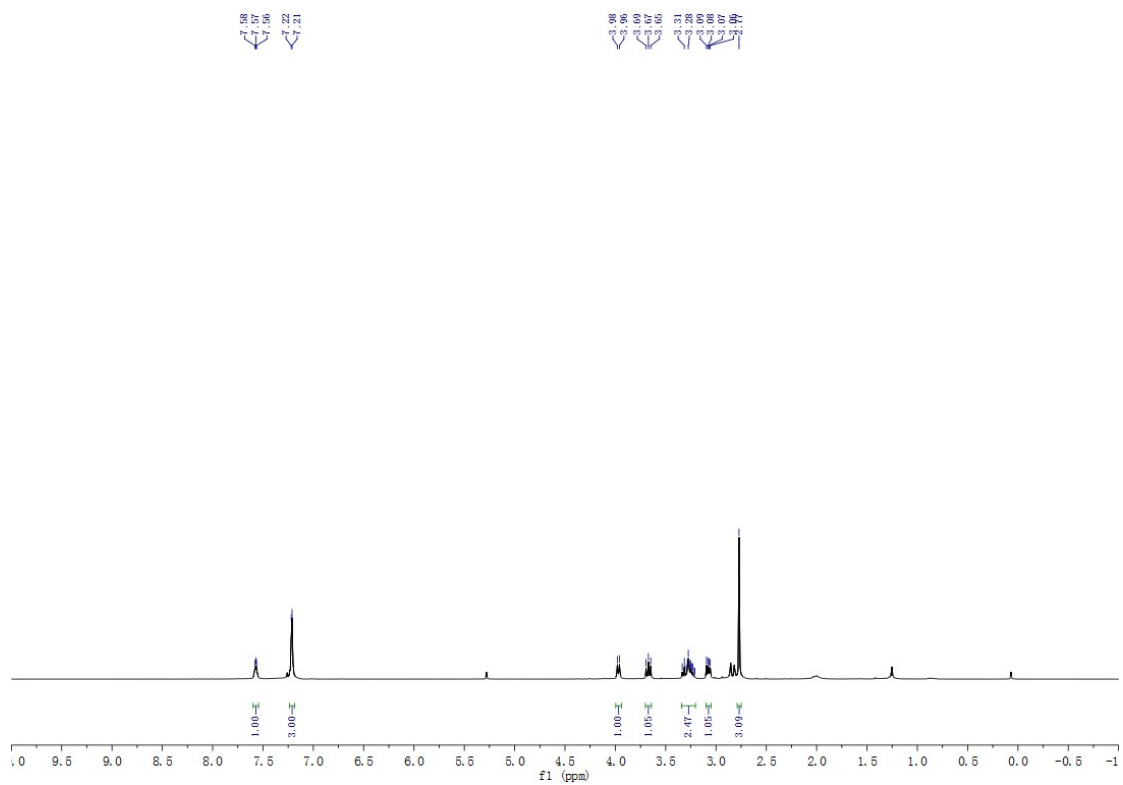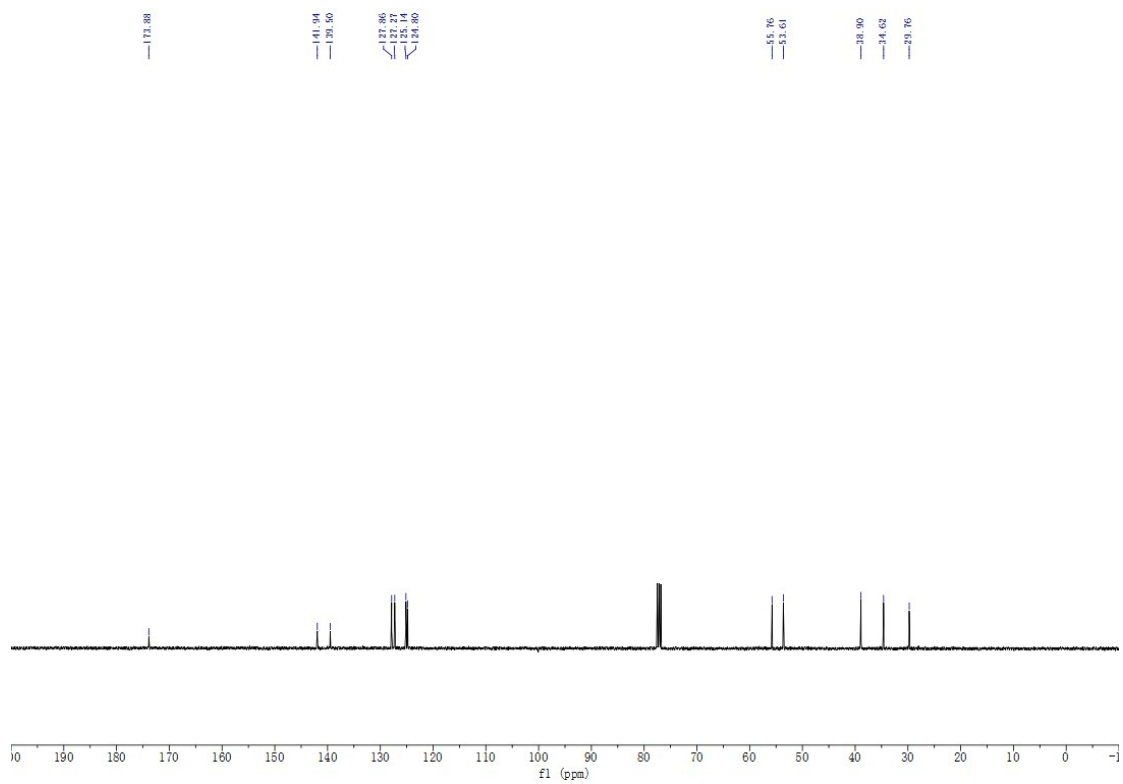

**2-methyl-3,3a,4,5-tetrahydro-2H-benzof[e]isoindole-1-carbonitrile (4y)**

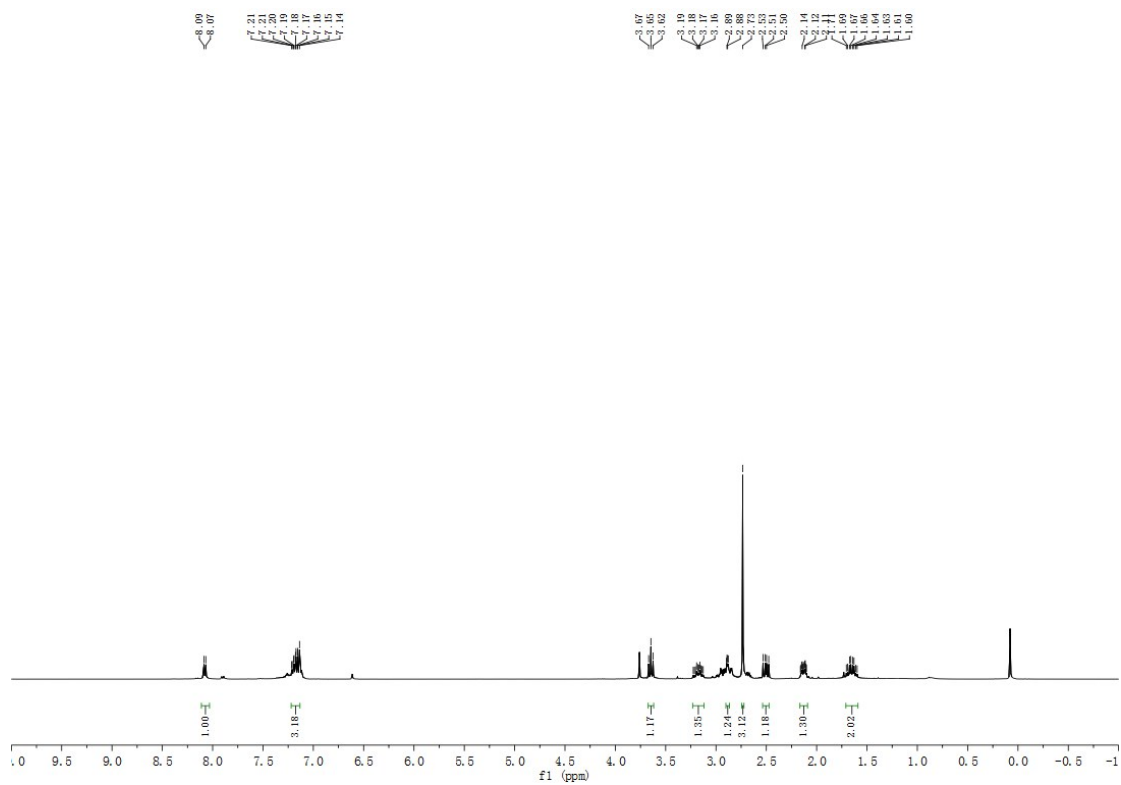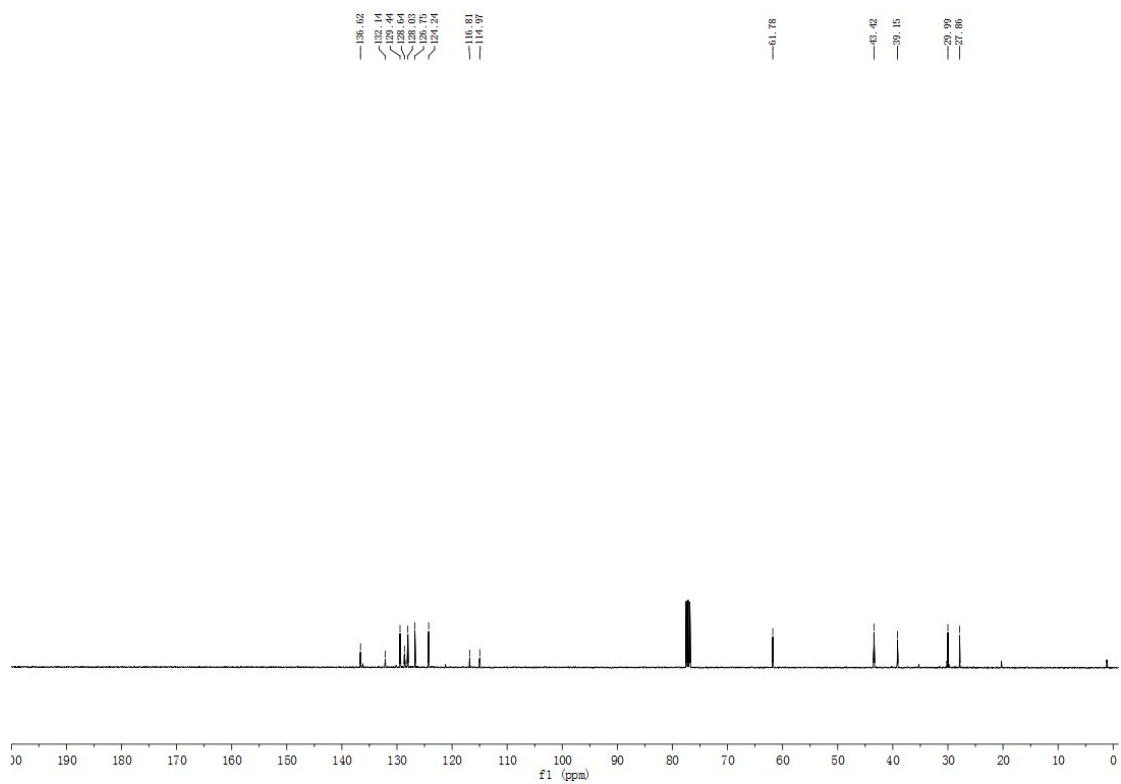

*(E)*-1-methyl-3-styryl-4,5-dihydro-1H-pyrrole-2-carbonitrile (4z)

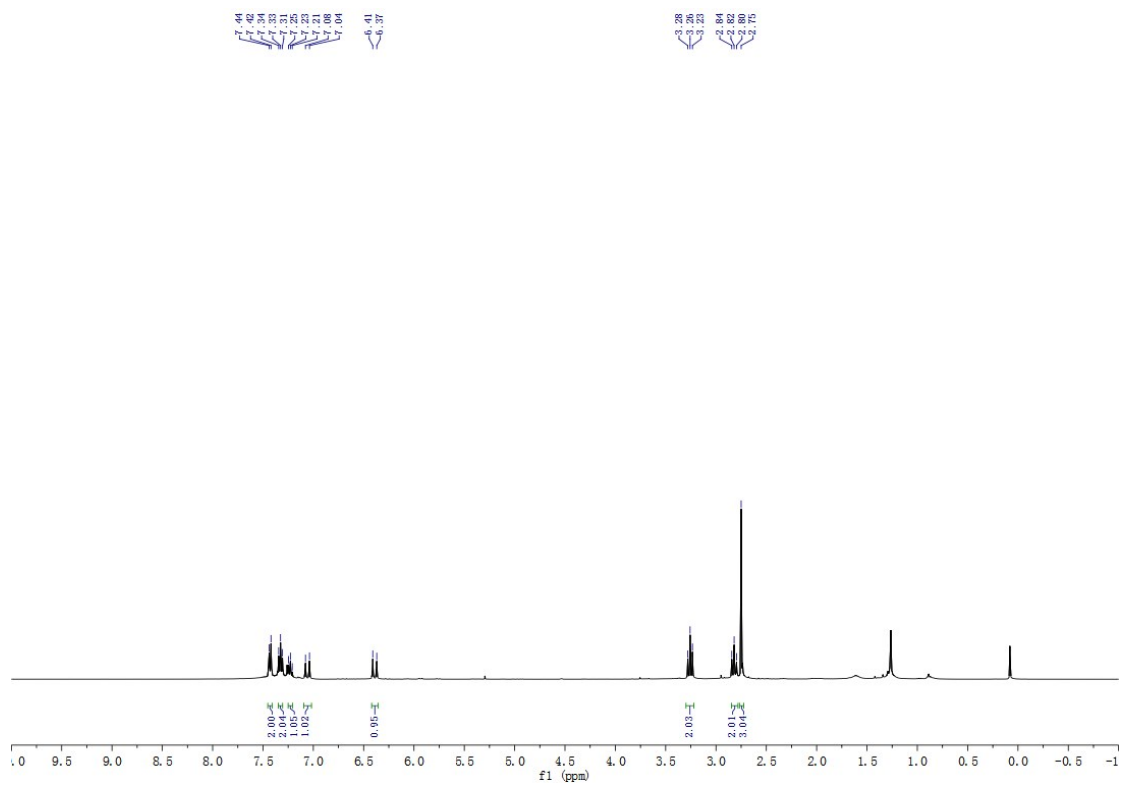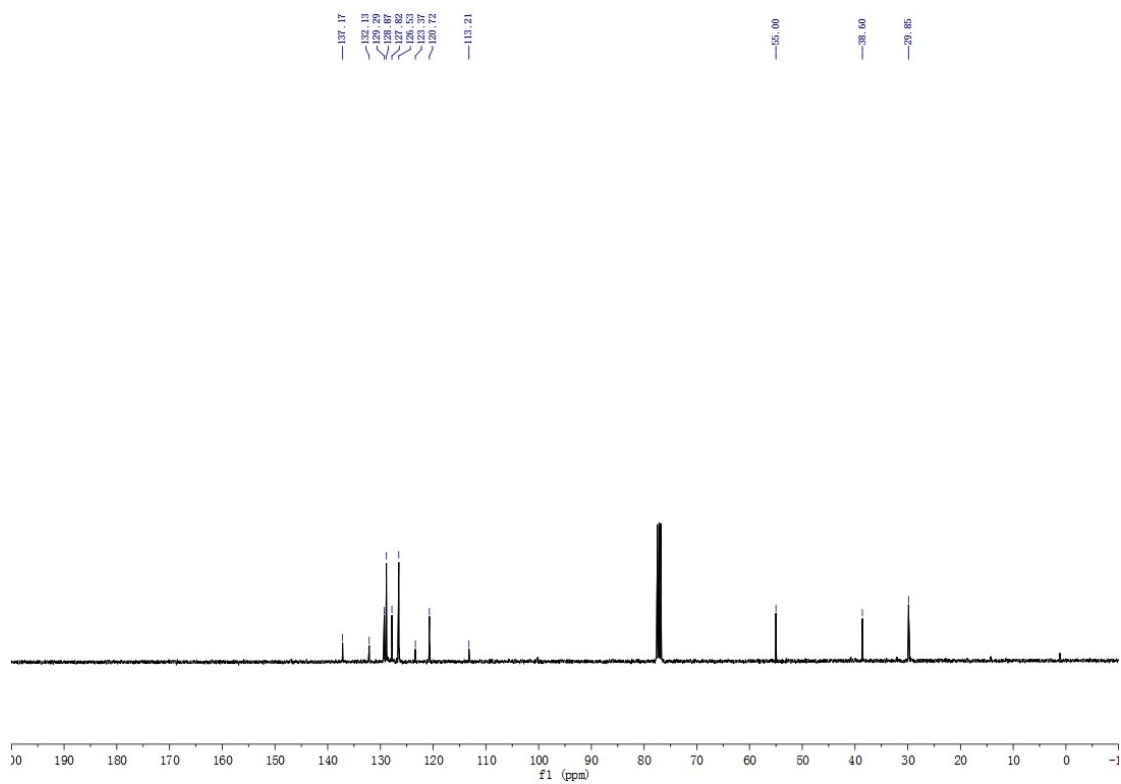

**1-ethyl-5-methyl-3-phenyl-4,5-dihydro-1H-pyrrole-2-carbonitrile (4aa)**

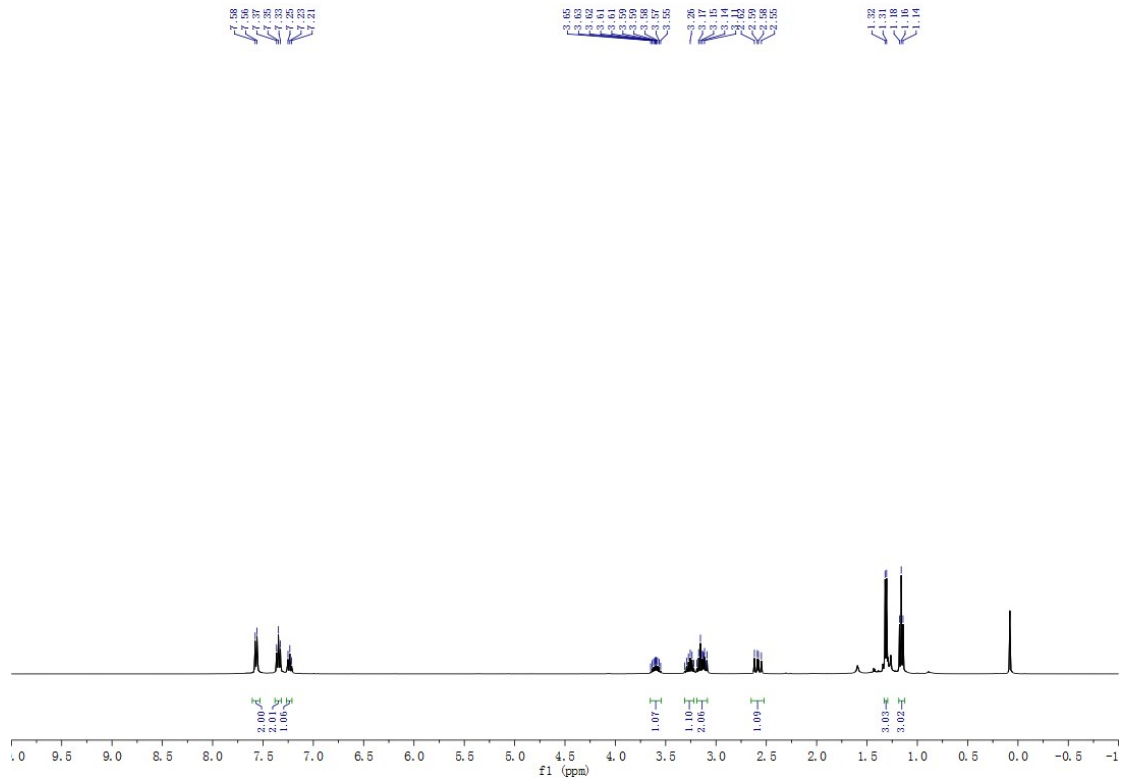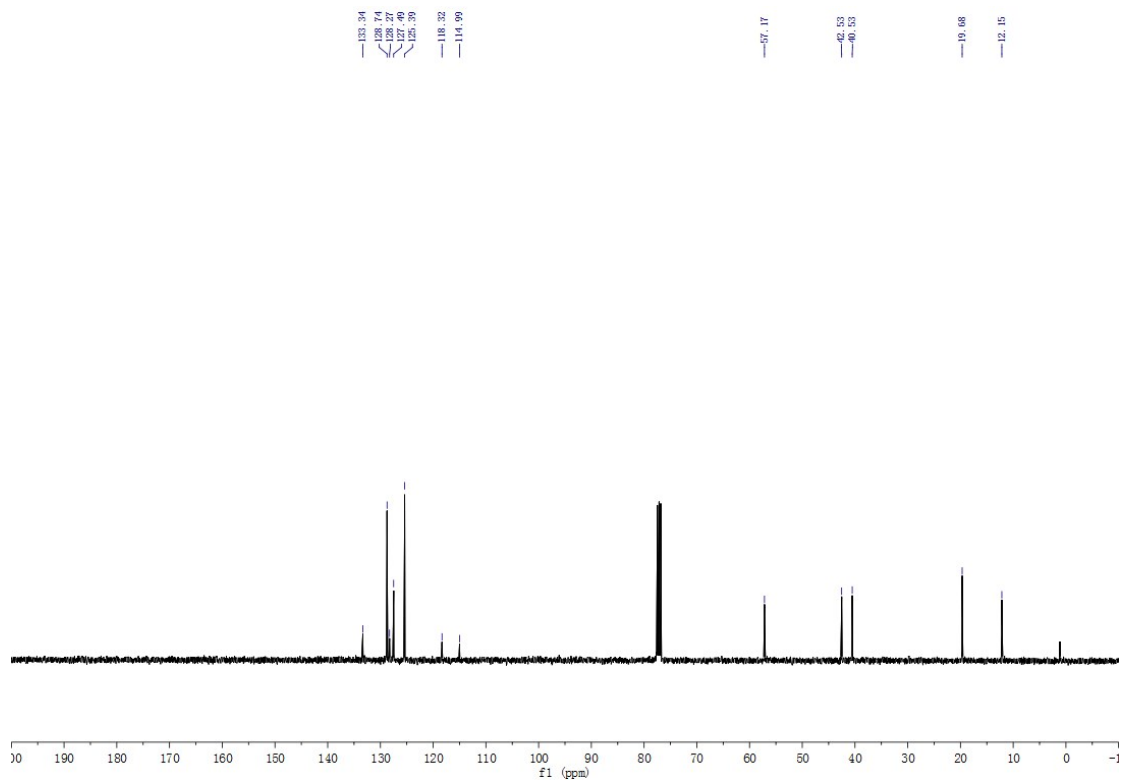

5-ethyl-3-phenyl-1-propyl-4,5-dihydro-1H-pyrrole-2-carbonitrile (4ab)

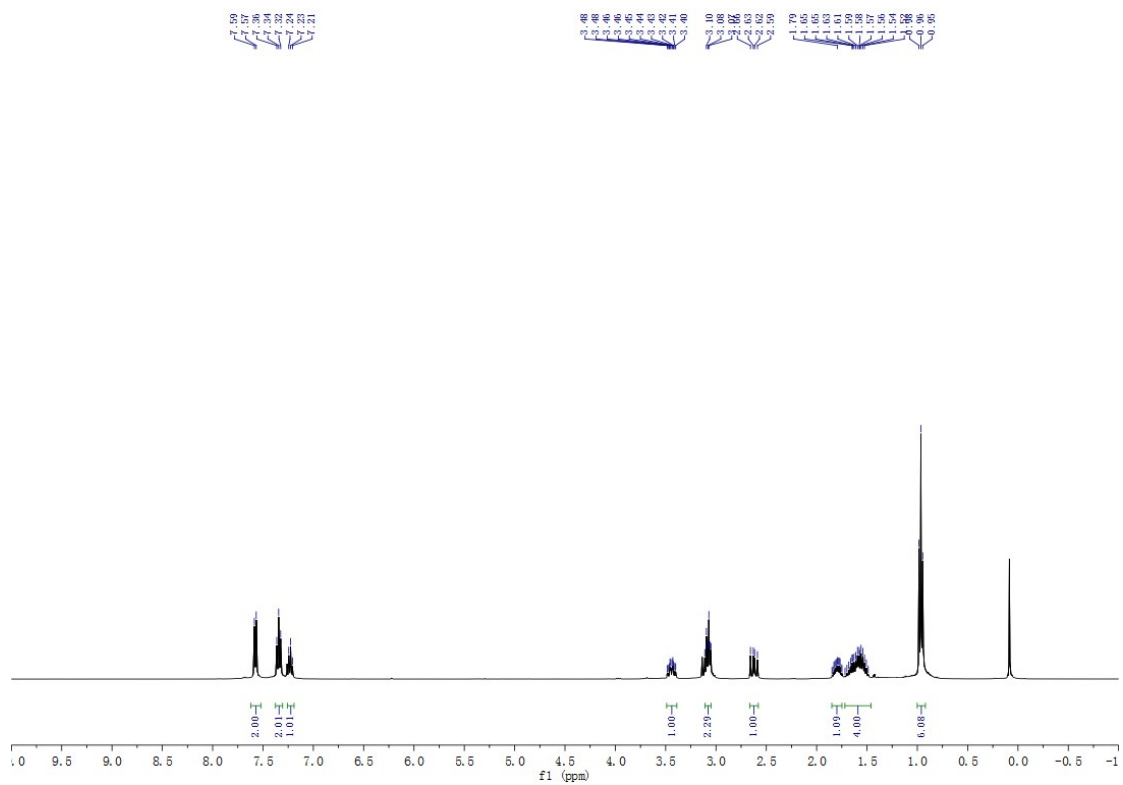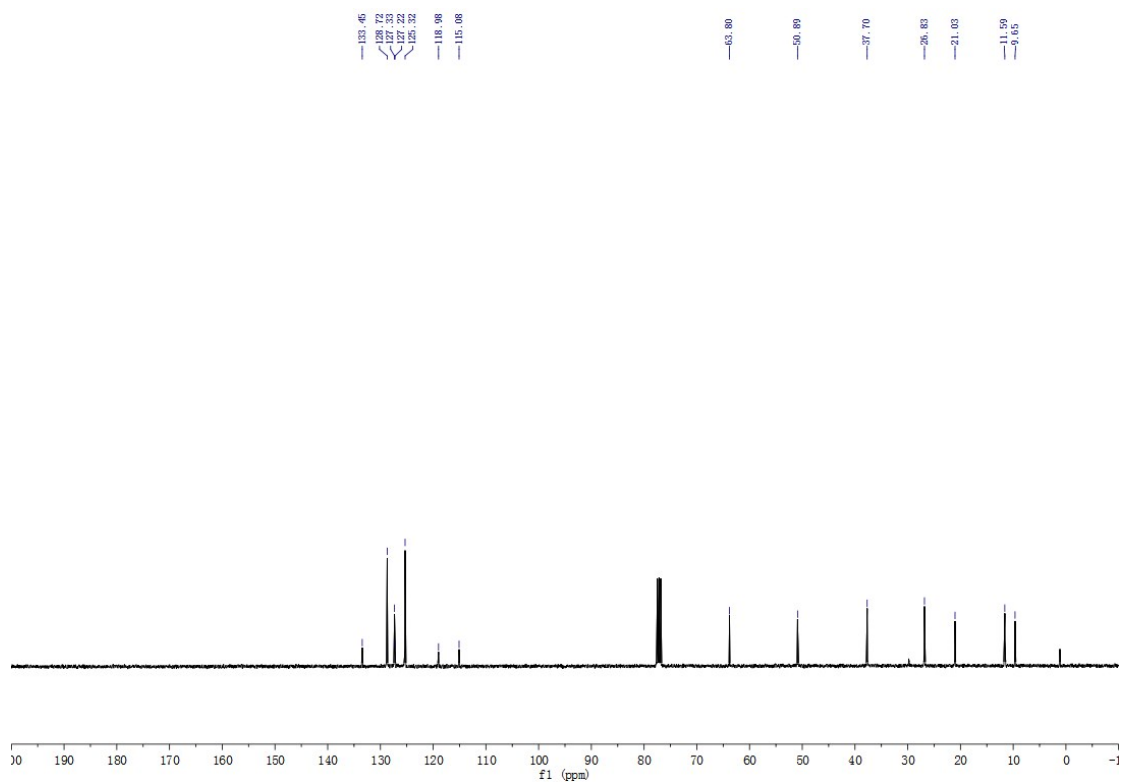

2-phenyl-1,5,6,7,8a-hexahydroindolizine-3-carbonitrile (4c)

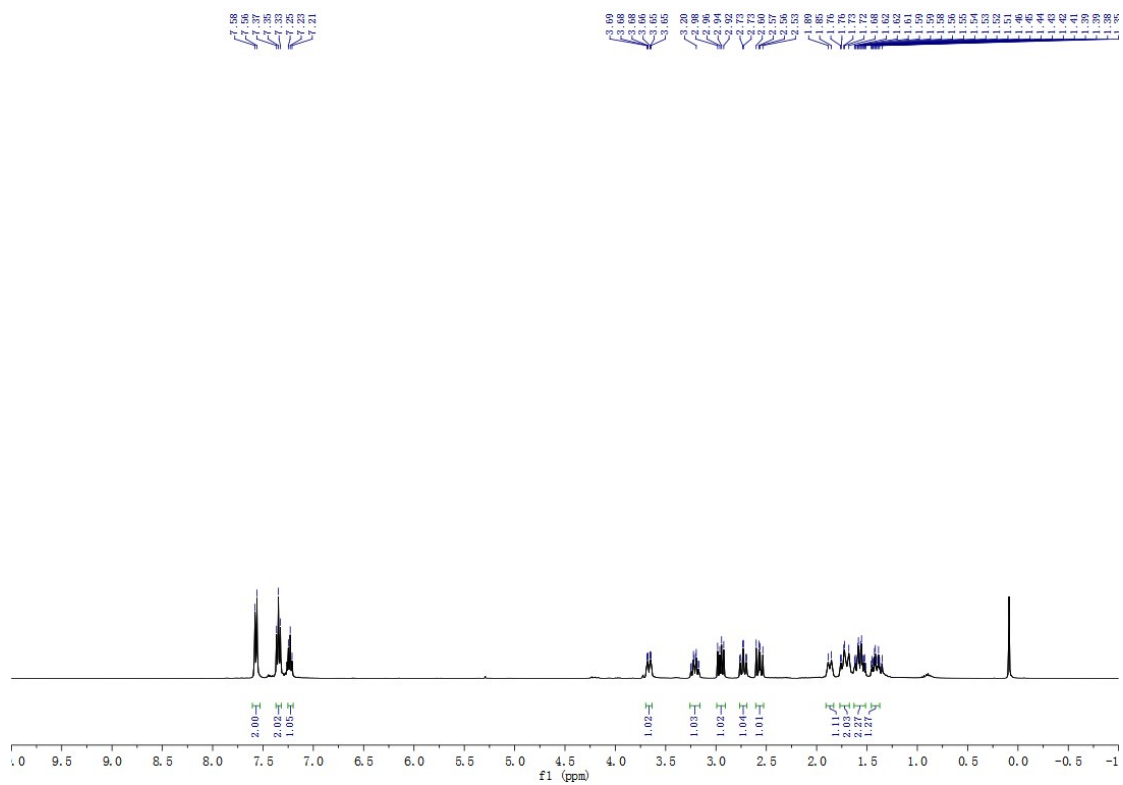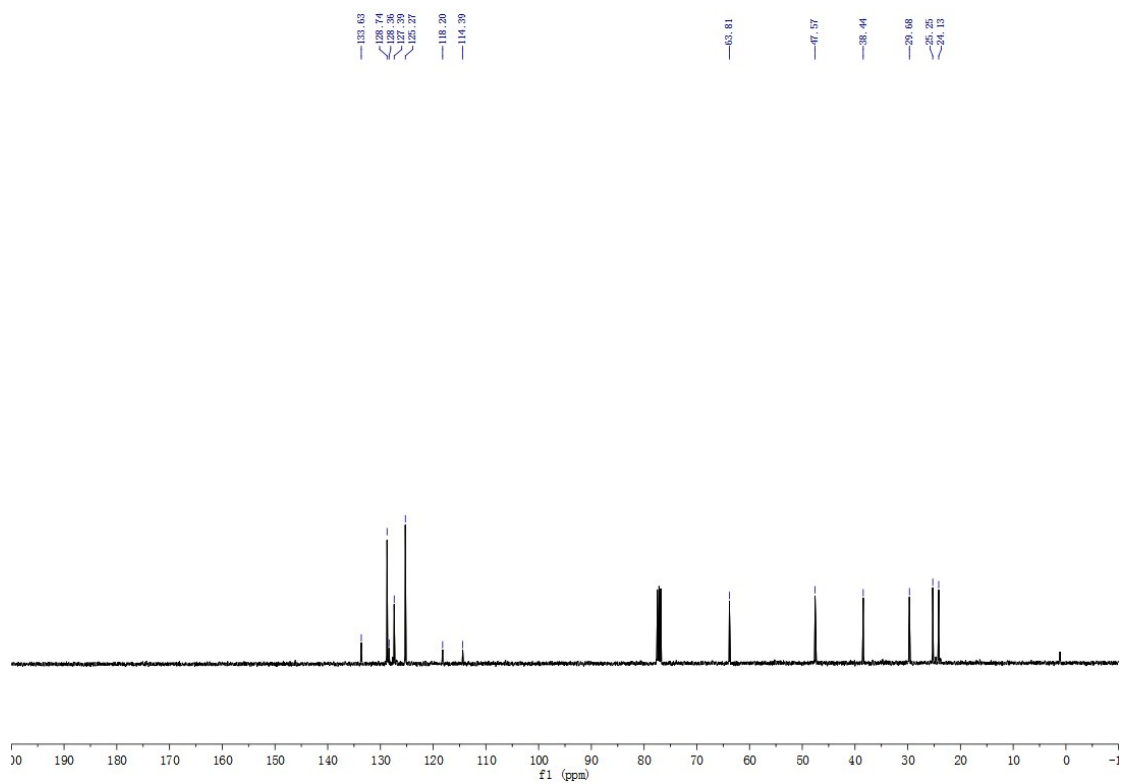

Supplement: d0qo01113d1.pdf [file d0qo01113d1.pdf]
